# Supplementary material for: Crewmember microbiome may influence microbial composition of ISS habitable surfaces
Source: PubMed Central journal article supplement (PMC7190111; doi:10.1371/journal.pone.0231838), 2020-04-29
Supplement: pone.0231838.s009.pdf [file pone.0231838.s009.pdf]

| genus             | Flights 1–3 |                |                            | Flights 4, 5 |                |                            |
|-------------------|-------------|----------------|----------------------------|--------------|----------------|----------------------------|
|                   | rank        | Cen( $p$ ) [%] | $\overline{\text{clr}(p)}$ | rank         | Cen( $p$ ) [%] | $\overline{\text{clr}(p)}$ |
| Penicillium       | 1           | 33.28          | 16.30                      | 60           | 0.03           | 6.71                       |
| Staphylococcus    | 2           | 22.84          | 15.76                      | 2            | 16.09          | 15.84                      |
| Pantoea           | 3           | 2.83           | 12.74                      | 116          | 0.01           | 4.39                       |
| Lecanosticta      | 4           | 2.62           | 12.63                      | 423          | 0.00           | 0.03                       |
| Methylobacterium  | 5           | 5.87           | 13.03                      | 12           | 0.39           | 10.46                      |
| Propionibacterium | 6           | 1.72           | 12.02                      | 1            | 63.66          | 17.82                      |
| Klebsiella        | 7           | 1.58           | 11.93                      | 42           | 0.06           | 7.79                       |
| Aspergillus       | 8           | 1.60           | 11.92                      | 54           | 0.04           | 7.17                       |
| Rhodotorula       | 9           | 1.45           | 11.78                      | 314          | 0.00           | 1.17                       |
| Enterobacter      | 10          | 1.37           | 11.68                      | 39           | 0.08           | 8.09                       |
| Puccinia          | 11          | 0.83           | 10.97                      | 41           | 0.06           | 7.82                       |
| Pseudomonas       | 12          | 0.68           | 10.69                      | 5            | 1.13           | 12.01                      |
| Streptococcus     | 15          | 0.32           | 9.57                       | 3            | 3.56           | 13.66                      |
| Acinetobacter     | 18          | 0.23           | 9.11                       | 8            | 0.67           | 11.25                      |
| Corynebacterium   | 21          | 0.14           | 8.36                       | 4            | 2.61           | 13.21                      |
| Malassezia        | 30          | 0.05           | 6.86                       | 7            | 0.73           | 11.37                      |
| Veillonella       | 40          | 0.02           | 5.80                       | 9            | 0.56           | 10.99                      |
| Prevotella        | 44          | 0.02           | 5.50                       | 10           | 0.53           | 10.92                      |
| Actinomyces       | 52          | 0.07           | 5.89                       | 6            | 1.08           | 11.93                      |
| Rothia            | 92          | 0.03           | 4.31                       | 11           | 0.47           | 10.74                      |
| PMA               |             |                |                            |              |                |                            |
