# Supplementary material for: Crewmember microbiome may influence microbial composition of ISS habitable surfaces
Source: PubMed Central journal article supplement (PMC7190111; doi:10.1371/journal.pone.0231838), 2020-04-29
Supplement: pone.0231838.s022.pdf [file pone.0231838.s022.pdf]

# **Supplement to Crewmember microbiome may influence microbial composition of ISS habitable surfaces**

Aram Avila-Herrera (avilaherrera1@llnl.gov)  
Nicholas Be (be1@llnl.gov) James Thissen (thissen3@llnl.gov)  
Camilla Urbaniak (camilla.urbaniak@jpl.nasa.gov)

2020-03-13



# Contents

|          |                                                 |           |
|----------|-------------------------------------------------|-----------|
| <b>1</b> | <b>Prerequisites</b>                            | <b>5</b>  |
| 1.1      | Data and Results . . . . .                      | 5         |
| 1.2      | Code . . . . .                                  | 5         |
| 1.3      | Setup . . . . .                                 | 5         |
| <b>2</b> | <b>Prepare Data</b>                             | <b>9</b>  |
| 2.1      | Load LMAT read counts and sample data . . . . . | 9         |
| 2.2      | Mapped reads . . . . .                          | 10        |
| 2.3      | LMAT matchscores . . . . .                      | 14        |
| 2.4      | CLR monte carlo . . . . .                       | 16        |
| 2.5      | Select samples . . . . .                        | 17        |
| 2.6      | Save . . . . .                                  | 17        |
| <b>3</b> | <b>Prevalence and Abundance</b>                 | <b>19</b> |
| 3.1      | Geometric mean . . . . .                        | 19        |
| 3.2      | Groups of samples . . . . .                     | 20        |
| 3.3      | Top taxa . . . . .                              | 20        |
| 3.4      | Proportion bars . . . . .                       | 21        |
| 3.5      | MT1 vs MT2 . . . . .                            | 24        |
| 3.6      | Caveats . . . . .                               | 26        |
| <b>4</b> | <b>Alpha diversity</b>                          | <b>27</b> |
| 4.1      | Richness and Evenness . . . . .                 | 27        |
| 4.2      | $N_1$ vs. mapped microbial reads . . . . .      | 27        |
| 4.3      | Effective counts of taxa . . . . .              | 29        |
| 4.4      | Saliva $\alpha$ -diversity . . . . .            | 31        |
| 4.5      | Caveats . . . . .                               | 38        |
| <b>5</b> | <b>Beta-diversity</b>                           | <b>39</b> |
| 5.1      | Ecological distances . . . . .                  | 39        |
| 5.2      | Ordination . . . . .                            | 39        |
| 5.3      | PERMANOVA . . . . .                             | 46        |
| 5.4      | aldex.glm . . . . .                             | 55        |
| 5.5      | Saliva by flight state . . . . .                | 55        |
| 5.6      | “Venn” (Euler) Diagrams . . . . .               | 58        |

|                        |           |
|------------------------|-----------|
| <b>6 SourceTracker</b> | <b>63</b> |
| 6.1 F4 vs F5 . . . . . | 64        |

```
knitr::opts_chunk$set(  
  collapse = FALSE, comment = "#>",  
  echo = params$show_code,  
  cache = TRUE,  
  cache.rebuild = params$rebuild  
)
```

# 1 Prerequisites

This notebook is written in **Markdown**.

The **bookdown** package can be installed from CRAN or Github:

To compile this example to PDF, we'll need XeLaTeX. You are recommended to install TinyTeX (which includes XeLaTeX): <https://yihui.org/tinytex/>.

## 1.1 Data and Results

**data/** Minimally post-processed data are included in this directory. For example, here we will find read counts as processed by LMAT, a table of sample metadata, and pre-computed ALDEx2 objects.

**results/** Computed results such as summarized and filtered read counts, ranked lists of taxa, ordination coordinates, distances, etc...

**figures/ and tables/** Main and supplementary figures and tables will be saved here.

## 1.2 Code

The bulk of the code exists in the Rmarkdown files (\*.Rmd). Helper scripts are in **scripts/** and custom R functions will be in **R/**.

## 1.3 Setup

```
#> R version 3.6.2 (2019-12-12)
#> Platform:
#> Running under:
#>
#> Matrix products: default
#> BLAS/LAPACK: libopenblas-r0.3.7.dylib
#>
#> locale:
#> [1] en_US.UTF-8/en_US.UTF-8/en_US.UTF-8/C/en_US.UTF-8/en_US.UTF-8
```

## 1 Prerequisites

```
#>
#> attached base packages:
#> [1] stats      graphics  grDevices  utils      datasets  methods   base
#>
#> other attached packages:
#> [1] nvimcom_0.9-83    eulerr_6.0.0    phyloseq_1.28.0 kableExtra_1.1.0
#> [5] ggribbles_0.5.2   ggnomics_0.1.1  cowplot_1.0.0    vegan_2.5-6
#> [9] lattice_0.20-38  permute_0.9-5   ALDEx2_1.16.0    glue_1.3.1
#> [13] magrittr_1.5      forcats_0.4.0   stringr_1.4.0    dplyr_0.8.4
#> [17] purrr_0.3.3      readr_1.3.1     tidyr_1.0.2      tibble_2.1.3
#> [21] ggplot2_3.2.1    tidyverse_1.3.0
#>
#> loaded via a namespace (and not attached):
#> [1] nlme_3.1-144      bitops_1.0-6
#> [3] matrixStats_0.55.0 fs_1.3.1
#> [5] lubridate_1.7.4   webshot_0.5.2
#> [7] httr_1.4.1        GenomeInfoDb_1.20.0
#> [9] tools_3.6.2       backports_1.1.5
#> [11] R6_2.4.1          DBI_1.1.0
#> [13] lazyeval_0.2.2    BiocGenerics_0.30.0
#> [15] mgcv_1.8-31       colorspace_1.4-1
#> [17] ade4_1.7-13       withr_2.1.2
#> [19] tidyselect_1.0.0  compiler_3.6.2
#> [21] cli_2.0.1         rvest_0.3.5
#> [23] Biobase_2.44.0    xml2_1.2.2
#> [25] DelayedArray_0.10.0 bookdown_0.18
#> [27] scales_1.1.0     digest_0.6.23
#> [29] rmarkdown_2.1    XVector_0.24.0
#> [31] pkgconfig_2.0.3  htmltools_0.4.0
#> [33] dbplyr_1.4.2     rlang_0.4.4
#> [35] readxl_1.3.1     rstudioapi_0.11
#> [37] generics_0.0.2   jsonlite_1.6.1
#> [39] BiocParallel_1.18.1 RCurl_1.98-1.1
#> [41] GenomeInfoDbData_1.2.1 biomformat_1.12.0
#> [43] Matrix_1.2-18    Rhdf5lib_1.6.3
#> [45] Rcpp_1.0.3       munsell_0.5.0
#> [47] S4Vectors_0.22.1 fansi_0.4.1
#> [49] ape_5.3          lifecycle_0.1.0
#> [51] stringi_1.4.5    yaml_2.2.1
#> [53] MASS_7.3-51.5    SummarizedExperiment_1.14.1
#> [55] zlibbioc_1.30.0  rhdf5_2.28.1
#> [57] plyr_1.8.5       grid_3.6.2
#> [59] parallel_3.6.2   crayon_1.3.4
#> [61] Biostrings_2.52.0 haven_2.2.0
```

```
#> [63] splines_3.6.2          multtest_2.40.0
#> [65] hms_0.5.3             knitr_1.28
#> [67] pillar_1.4.3         igraph_1.2.4.2
#> [69] GenomicRanges_1.36.1 reshape2_1.4.3
#> [71] codetools_0.2-16     stats4_3.6.2
#> [73] reprex_0.3.0         evaluate_0.14
#> [75] data.table_1.12.8    modelr_0.1.5
#> [77] foreach_1.4.8        vctrs_0.2.2
#> [79] cellranger_1.1.0     gtable_0.3.0
#> [81] assertthat_0.2.1     xfun_0.12
#> [83] broom_0.5.4          survival_3.1-8
#> [85] viridisLite_0.3.0    iterators_1.0.12
#> [87] IRanges_2.18.3       cluster_2.1.0
```





## 2 Prepare Data

### 2.1 Load LMAT read counts and sample data

LMAT maps the reads from shotgun metagenomic sequencing to taxonomic lineages as specifically as possible, according to match scores above a certain threshold. (Briefly, a read must match a *taxid* better than would the best of 1 million random length and GC-matched reads, and the read must match the *taxid* better than it would a parent or sibling *taxid*).

A closed reference based on NCBI taxonomy is used, and we'll focus our analyses only on reads that have been assigned to a microbial genus or species. The function `keep_lmat_microbes` removes *taxids* (and their read counts) containing the kingdom Metazoa or Viridiplantae in their lineage, and it also removes taxons with the word “synthetic” in the species name.

We summarize read count totals at the genus and species levels.

```
#> function (lmat)
#> {
#>   lmat %>% filter(!(kingdom %in% c("Metazoa", "Viridiplantae"))) |
#>     is.na(kingdom)) %>% filter(!grepl("synthetic", species))
#> }
```

We have many samples across the flights, but perhaps not so many per location and type.

Table 2.1: sample tally

| experiment | type    | location     | pma_treated | n  |
|------------|---------|--------------|-------------|----|
| crew       | control | control_body | no          | 7  |
| crew       | control | NA           | no          | 4  |
| crew       | sample  | ear          | no          | 8  |
| crew       | sample  | mouth        | no          | 8  |
| crew       | sample  | nostril      | no          | 8  |
| crew       | sample  | saliva       | no          | 31 |

## 2 Prepare Data

Table 2.1: sample tally (*continued*)

| experiment | type    | location              | pma_treated | n |
|------------|---------|-----------------------|-------------|---|
| crew       | sample  | skin                  | no          | 8 |
| surfaces   | control | control_filter        | no          | 2 |
| surfaces   | control | control_filter        | yes         | 2 |
| surfaces   | control | control_filter_sample | no          | 2 |
| surfaces   | control | control_filter_sample | yes         | 2 |
| surfaces   | control | control_library_ntc   | no          | 1 |
| surfaces   | control | control_maxwell       | no          | 1 |
| surfaces   | control | control_wipe_flown    | no          | 2 |
| surfaces   | control | control_wipe_flown    | yes         | 2 |
| surfaces   | control | control_zymo_culture  | no          | 1 |
| surfaces   | control | control_zymo_dna      | no          | 2 |
| surfaces   | sample  | ARED_foot_platform    | no          | 5 |
| surfaces   | sample  | ARED_foot_platform    | yes         | 5 |
| surfaces   | sample  | dining_table          | no          | 5 |
| surfaces   | sample  | dining_table          | yes         | 5 |
| surfaces   | sample  | lab_overhead_3        | no          | 5 |
| surfaces   | sample  | lab_overhead_3        | yes         | 5 |
| surfaces   | sample  | overhead_4            | no          | 5 |
| surfaces   | sample  | overhead_4            | yes         | 5 |
| surfaces   | sample  | PMM_port_1            | no          | 2 |
| surfaces   | sample  | PMM_port_1            | yes         | 2 |
| surfaces   | sample  | port_crew_quarters    | no          | 5 |
| surfaces   | sample  | port_crew_quarters    | yes         | 5 |
| surfaces   | sample  | port_panel            | no          | 5 |
| surfaces   | sample  | port_panel            | yes         | 5 |
| surfaces   | sample  | WHC                   | no          | 5 |
| surfaces   | sample  | WHC                   | yes         | 5 |

We store abundance data as a list of nested data frames.

### 2.2 Mapped reads

We inspect the number of reads (technically read pairs) that map to a genus, species, and any taxonomy ID greater than 1 per sample. The fraction out of the total of microbial reads output by LMAT is also shown. Reads counts that do not map at the genus or

## 2.2 Mapped reads

species levels are removed from further analyses (e.g., “unknowns”, or mapping at phyla level only, etc...).





## 2.3 LMAT matchescores

Every read has a matchescore assigned by LMAT. Reads with a matchescore lower than the threshold of 0.5 were removed. A matchescore of 0.5 means that the read's fraction of  $k$ -mers that match a reference taxon is  $\exp(0.5) = 1.6487213$  times as large as a random read's fraction of matching  $k$ -mers (as generated by LMAT's null model).

**In the reads which passed the matchescore threshold**, taxa seen in most negative control samples were mapped to about as well as those in samples and positive controls (There are microbes detected in the negative controls).

```
#> Picking joint bandwidth of 0.127
```

```
#> Picking joint bandwidth of 0.121
```

```
#> Picking joint bandwidth of 0.109
```

```
#> Picking joint bandwidth of 0.111
```

```
#> Picking joint bandwidth of 0.102
```

```
#> Picking joint bandwidth of 0.0954
```

## 2.3 LMAT matchscores

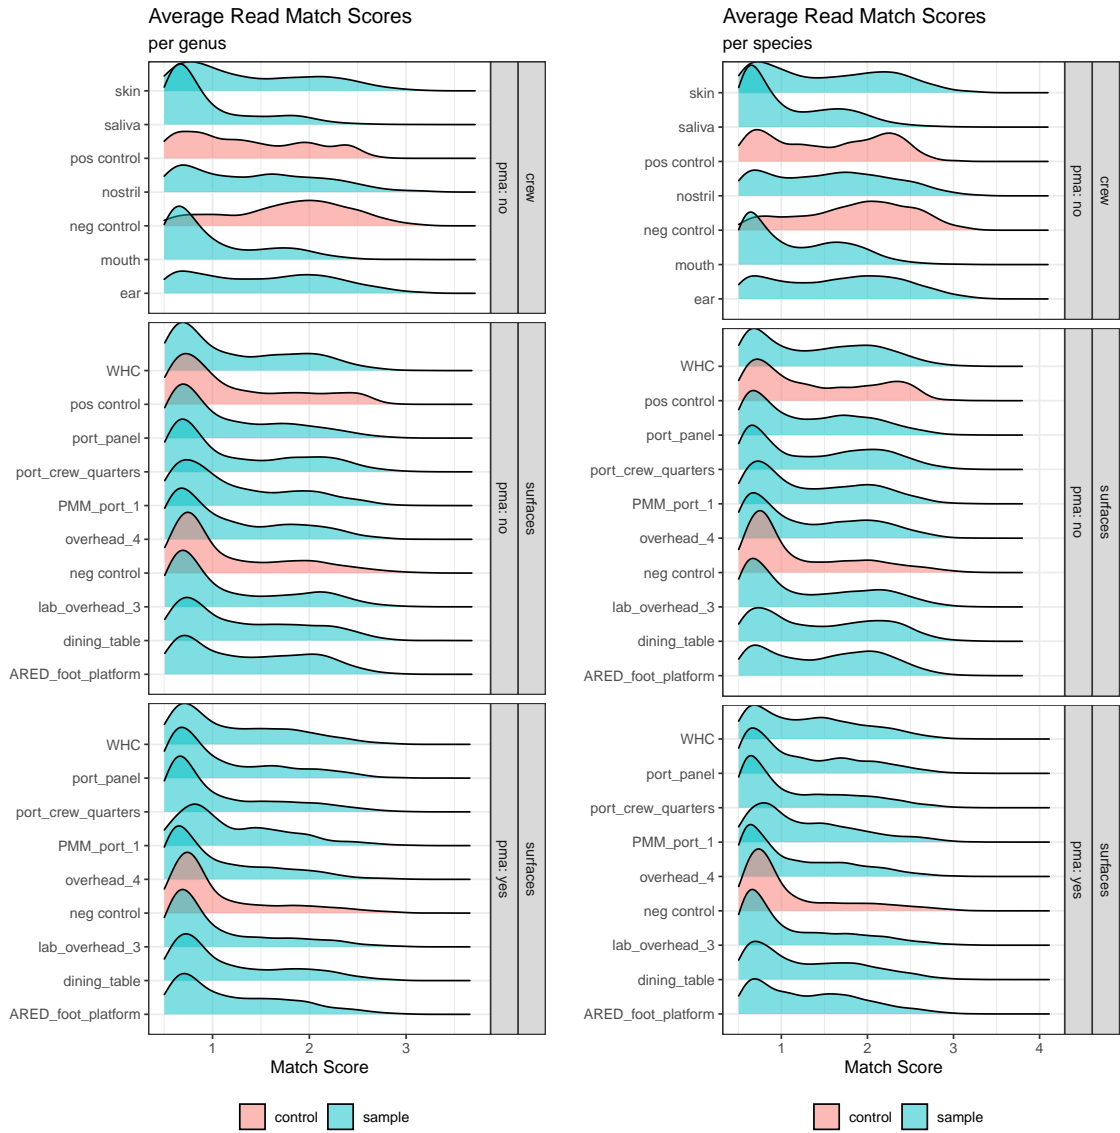

## 2 Prepare Data

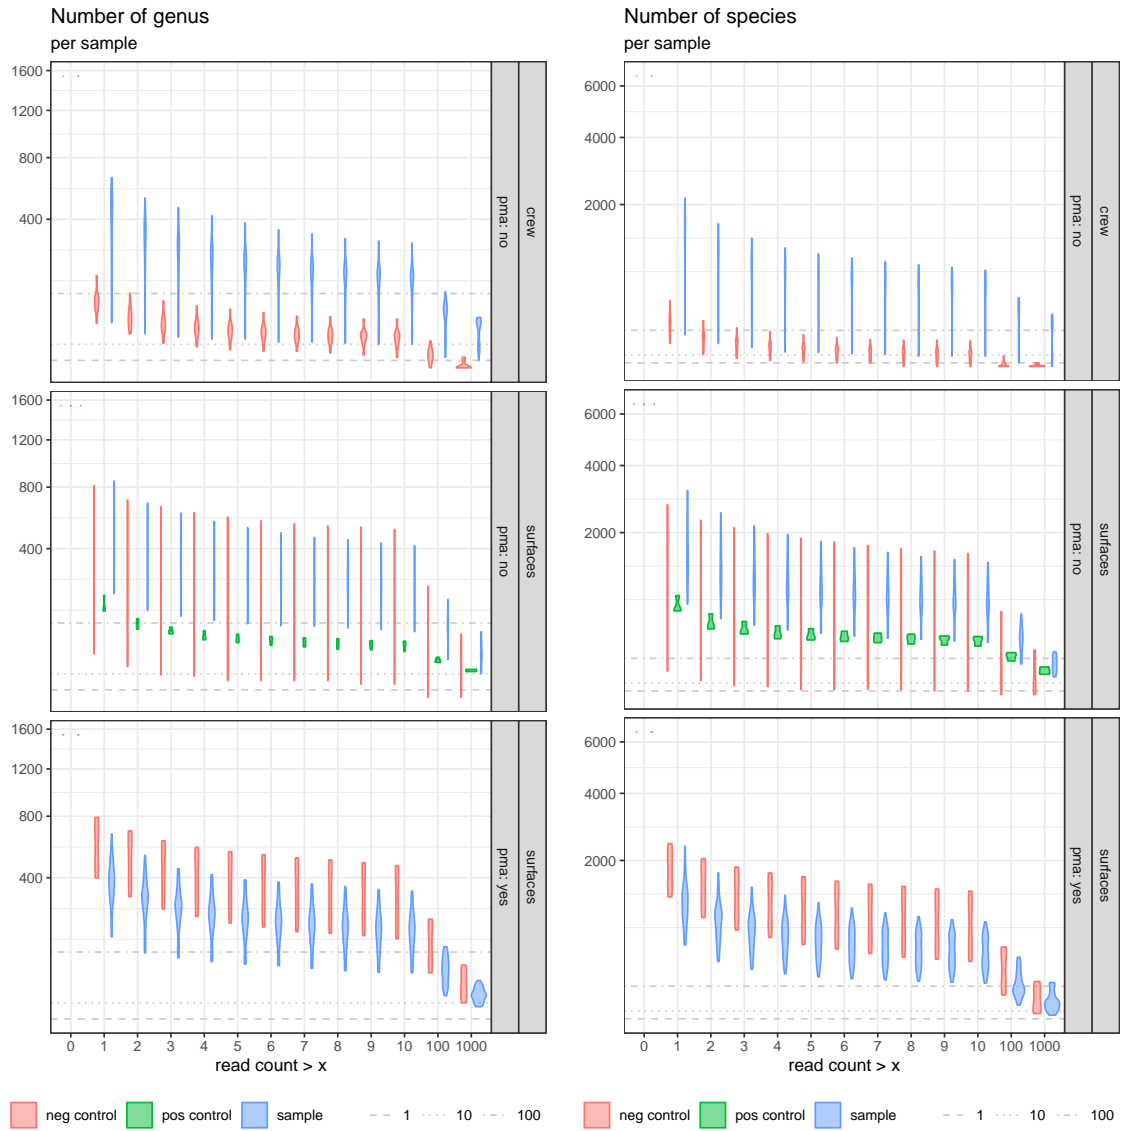

### 2.3.1 Save data with UNKNOWNs

## 2.4 CLR monte carlo

For many of the following analyses we will be treating the mapped reads as compositions (parts constrained to sum to a not-very-informative-total). For example, an increase in one species proportion will necessarily decrease others, which potentially leads to spurious Pearson correlations. The centered log ratio (clr) transform is applied to compositional data in order to apply statistical methods developed for unconstrained



data. Species abundances can instead be interpreted with respect to a sample's mean abundance (with the assumption that the mean is a *mean*-ingful reference).

The `aldex2` package samples clr-transformed expected abundances for each sample from a Dirichlet posterior distribution with concentration parameter  $\alpha = \text{read\_counts} + 0.5$ . We then take the mean of the transformed counts as a point estimate for visualization and distance-based analyses. Unmapped read counts were removed prior to the calculation.

The clr transformation is sensitive to removing or adding elements to the composition (i.e., filtering species changes the means, which in turn changes the ratios). We'll remove the UNKNOWNs only.

This next part takes a few minutes.

## 2.5 Select samples

For the main analyses, we separate samples from controls and make sure unmapped read counts are removed.

## 2.6 Save

We save read counts in two tables, one for species and one for genera. Unmapped read counts are included, with an "NA" entry for the clr value. We also save the "microbial" only read counts in a third table. These data and the parameters used to run `aldex.clr` are saved as two R objects as well.



## 3 Prevalence and Abundance

We take a roll call of our tiny stowaways and estimate two parameters of the samples. For our purposes, we define **prevalence** of a taxon as the proportion of samples (of a particular environment or type, e.g., `experiment x pma_treated x location`) in which we detect its presence (usually above a threshold). Relative abundance is the fraction of reads mapped to a taxon in a particular sample. Relative **abundances** are averaged across samples of a particular type or group.

### 3.1 Geomtric mean

For averaging abundance, we use the geometric mean (*GM*) because it consistently ranks taxa regardless of which constant is used to “normalize” read counts. In this case, the average proportion of read counts across samples and the average read counts divided by the average “library sizes” should be ranked consistently.

For taxon  $t$  with counts  $\vec{x}_t$  and library sizes  $\vec{L}$ :

$$GM\left(\frac{\vec{x}_t}{\vec{L}}\right) = \frac{GM(\vec{x}_t)}{GM(\vec{L})}$$

In compositional data analysis, such means are often normalized to sum to 1 (i.e., the closure of geometric means). These are known as Centers (Cen). For example, if we had 3 taxa in many samples, their centers would look like  $\{\text{Cen}(\vec{x}_1), \text{Cen}(\vec{x}_2), \text{Cen}(\vec{x}_3)\}$ .

Zero counts are a “problem” for the geometric mean, because a single zero in a sample will drop a taxon’s average abundance to zero. Zero’s can be addressed by the following methods:

1. Replacing zeros with 1s (as in the `propr` package)
2. Adding a pseudocount to all counts (the `ALDEx2` package uses 0.5)
3. Excluding 0s from the calculation
4. Other fancy techniques

```
#> function (x, method = "discard")
#> {
#>   if (method == "ones") {
```

### 3 Prevalence and Abundance

```
#>      x[x == 0] <- 1
#>    }
#>    else if (method == "discard") {
#>      x <- keep(x, ~.x > 0)
#>    }
#>    else {
#>      x <- x + 0.5
#>    }
#>    if (length(x) == 0 & method == "discard") {
#>      g <- 0
#>    }
#>    else {
#>      g <- exp(mean(log(x)))
#>    }
#>    g
#> }
```

For the tables and figures, we use exclude 0s (method 3) while counting the number of non-zero abundances. For differential abundance analysis via ALDEx2, method 2 is used.

## 3.2 Groups of samples

Abundances are averaged within various groupings of samples. One investigator might want to rank genera by average abundance within body site. Another investigator might only care about samples taken during flight. Likewise, there are too many taxa to display in plots and choosing a “top N” only makes with respect to the samples displayed. Not to mention, it is possible to rank taxa by additional statistics, e.g., prevalence, log-ratio transformed abundances...

## 3.3 Top taxa

Color palettes max out at around 12 useful colors, arguably fewer.

We save a few top tables sorted by Cen(proportion)

```
#> Adding missing grouping variables: `experiment`, `pma_treated`, `flight_status`
#> Adding missing grouping variables: `experiment`, `pma_treated`, `flight_status`
```

## 3.4 Proportion bars

Behold the proportion of reads from the top 12 taxa by Cen(proportion) out of the top 12 taxa per group by mean clr transformed abundance.

```
#> Joining, by = c("pma_treated", "location", "experiment", "genus")
```

```
#> Joining, by = c("pma_treated", "location", "experiment", "species")
```

```
#> Removing pma treated samples
```

```
#> Joining, by = c("pma_treated", "location", "experiment", "genus")
```

```
#> Removing pma treated samples
```

```
#> Joining, by = c("pma_treated", "location", "experiment", "species")
```

```
#> Removing pma treated samples
```

```
#> Joining, by = c("pma_treated", "location", "experiment", "genus")
```

```
#> Removing pma treated samples
```

```
#> Joining, by = c("pma_treated", "location", "experiment", "species")
```

### 3.4.1 Crew

#### 3.4.1.1 genus

```
#> Warning in RColorBrewer::brewer.pal(n, pal): n too large, allowed maximum for palette Set3
#> Returning the palette you asked for with that many colors
```

### 3 Prevalence and Abundance

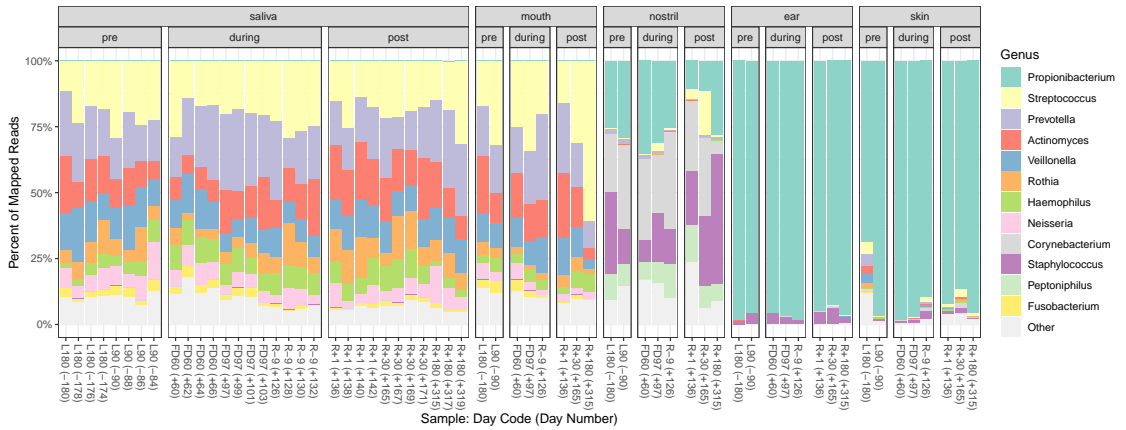

#### 3.4.1.2 species

#> Warning in RColorBrewer::brewer.pal(n, pal): n too large, allowed maximum for pa  
 #> Returning the palette you asked for with that many colors

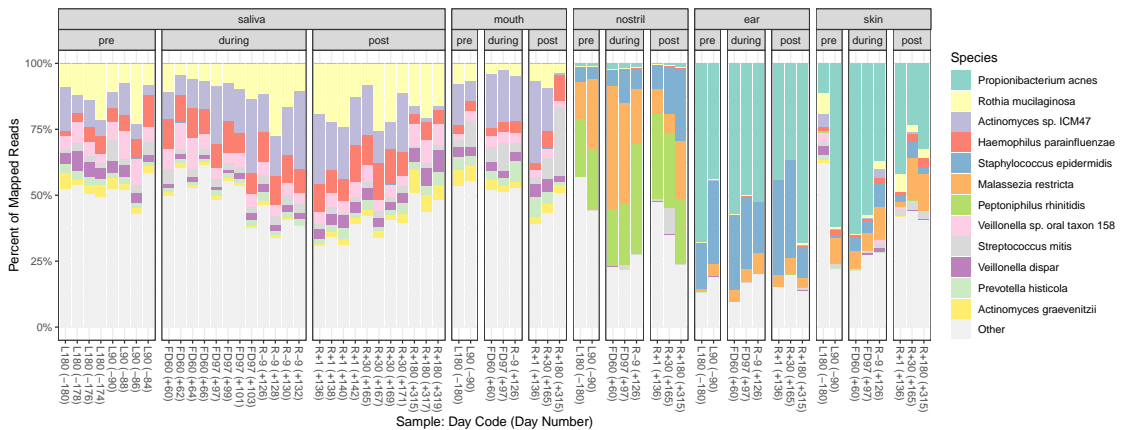

#> Warning in RColorBrewer::brewer.pal(n, pal): n too large, allowed maximum for pa  
 #> Returning the palette you asked for with that many colors

#> Warning in RColorBrewer::brewer.pal(n, pal): n too large, allowed maximum for pa  
 #> Returning the palette you asked for with that many colors

#### 3.4.2 Surfaces

No PMA

### 3.4 Proportion bars

#### 3.4.2.1 genus

```
#> Warning in RColorBrewer::brewer.pal(n, pal): n too large, allowed maximum for palette Set3  
#> Returning the palette you asked for with that many colors
```

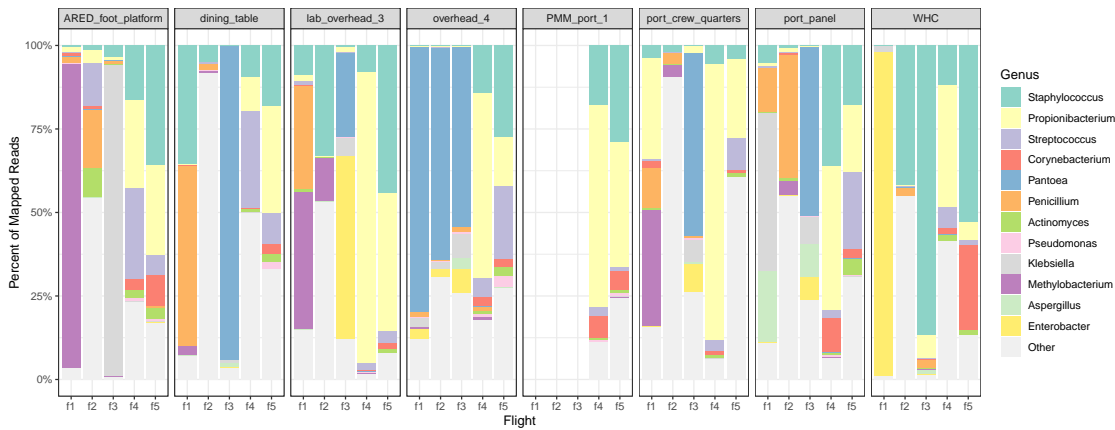

#### 3.4.2.2 species

```
#> Warning in RColorBrewer::brewer.pal(n, pal): n too large, allowed maximum for palette Set3  
#> Returning the palette you asked for with that many colors
```

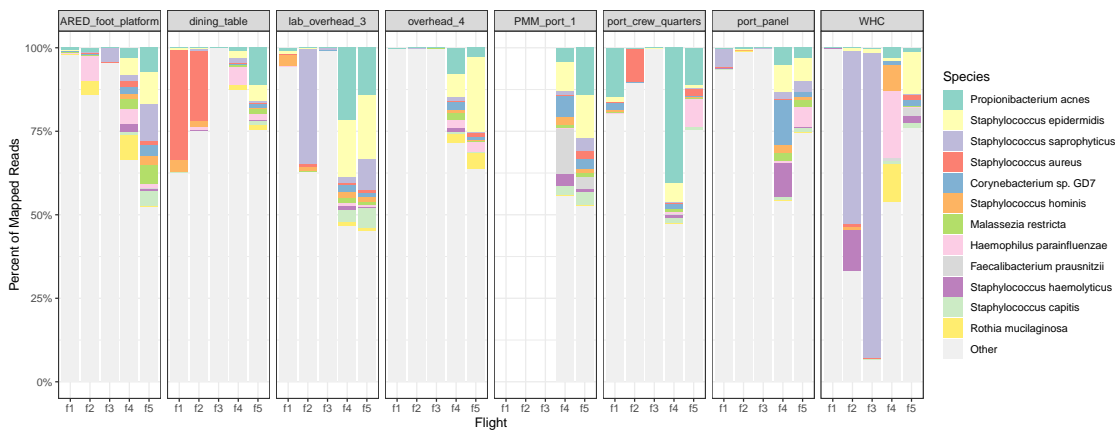

```
#> Warning in RColorBrewer::brewer.pal(n, pal): n too large, allowed maximum for palette Set3  
#> Returning the palette you asked for with that many colors
```

```
#> Warning in RColorBrewer::brewer.pal(n, pal): n too large, allowed maximum for palette Set3  
#> Returning the palette you asked for with that many colors
```

### 3 Prevalence and Abundance

```
#> Warning in RColorBrewer::brewer.pal(n, pal): n too large, allowed maximum for pa
#> Returning the palette you asked for with that many colors
```

## 3.5 MT1 vs MT2

Sample location ignored.

```
#> Joining, by = c("taxon", "pma_treated")
#> Joining, by = c("taxon", "pma_treated")
```

### 3.5.1 PMA

| genus             | Flights 1-3 |                     |                     |           | Flights 4, 5 |                     |                     |           |
|-------------------|-------------|---------------------|---------------------|-----------|--------------|---------------------|---------------------|-----------|
|                   | rank        | Cen( <i>p</i> ) [%] | $\overline{clr(p)}$ | Prev. [%] | rank         | Cen( <i>p</i> ) [%] | $\overline{clr(p)}$ | Prev. [%] |
| Penicillium       | 1           | 33.28               | 1629.82             | 100.00    | 60           | 0.03                | 670.89              | 100.00    |
| Staphylococcus    | 2           | 22.84               | 1575.67             | 100.00    | 2            | 16.09               | 1583.76             | 100.00    |
| Methylobacterium  | 3           | 5.87                | 1302.99             | 95.24     | 12           | 0.39                | 1046.07             | 100.00    |
| Pantoea           | 4           | 2.83                | 1274.37             | 100.00    | 123          | 0.01                | 438.83              | 100.00    |
| Lecanosticta      | 5           | 2.62                | 1263.36             | 100.00    | 424          | 0.00                | 3.35                | 37.50     |
| Propionibacterium | 6           | 1.72                | 1201.87             | 100.00    | 1            | 63.66               | 1782.07             | 100.00    |
| Klebsiella        | 7           | 1.58                | 1192.76             | 100.00    | 42           | 0.06                | 779.29              | 100.00    |
| Aspergillus       | 8           | 1.60                | 1191.50             | 100.00    | 55           | 0.04                | 716.91              | 100.00    |
| Rhodotorula       | 9           | 1.45                | 1177.85             | 100.00    | 293          | 0.00                | 117.45              | 43.75     |
| Enterobacter      | 10          | 1.37                | 1168.17             | 100.00    | 39           | 0.08                | 809.15              | 100.00    |
| Puccinia          | 11          | 0.83                | 1096.77             | 100.00    | 41           | 0.06                | 782.38              | 100.00    |
| Pseudomonas       | 12          | 0.68                | 1069.08             | 100.00    | 5            | 1.13                | 1200.94             | 100.00    |
| Rhodosporidium    | 13          | 0.50                | 1024.74             | 100.00    | 416          | 0.01                | 8.27                | 25.00     |
| Paenibacillus     | 14          | 0.41                | 997.22              | 100.00    | 75           | 0.02                | 617.40              | 100.00    |
| Escherichia       | 15          | 0.56                | 976.34              | 95.24     | 66           | 0.03                | 655.22              | 100.00    |
| Streptococcus     | 16          | 0.32                | 957.18              | 100.00    | 3            | 3.56                | 1365.92             | 100.00    |
| Acinetobacter     | 19          | 0.23                | 911.38              | 100.00    | 8            | 0.67                | 1125.34             | 100.00    |
| Corynebacterium   | 21          | 0.14                | 836.38              | 100.00    | 4            | 2.61                | 1321.35             | 100.00    |
| Malassezia        | 38          | 0.05                | 685.96              | 100.00    | 7            | 0.73                | 1137.24             | 100.00    |
| Haemophilus       | 46          | 0.03                | 602.26              | 100.00    | 14           | 0.33                | 1024.81             | 100.00    |
| Actinomyces       | 47          | 0.07                | 589.29              | 80.95     | 6            | 1.08                | 1193.38             | 100.00    |
| Veillonella       | 50          | 0.02                | 580.44              | 100.00    | 9            | 0.56                | 1099.15             | 100.00    |
| Prevotella        | 56          | 0.02                | 549.74              | 100.00    | 10           | 0.53                | 1092.17             | 100.00    |
| Neisseria         | 58          | 0.02                | 535.89              | 95.24     | 15           | 0.32                | 1016.94             | 100.00    |
| Rothia            | 92          | 0.03                | 430.96              | 76.19     | 11           | 0.47                | 1073.75             | 100.00    |
| Lactococcus       | 180         | 0.00                | 273.53              | 90.48     | 13           | 0.37                | 1041.01             | 100.00    |



### 3.5 MT1 vs MT2

| species                      | Flights 1-3 |                |                            |           | Flights 4, 5 |                |                            |           |
|------------------------------|-------------|----------------|----------------------------|-----------|--------------|----------------|----------------------------|-----------|
|                              | rank        | Cen( $p$ ) [%] | $\overline{\text{clr}(p)}$ | Prev. [%] | rank         | Cen( $p$ ) [%] | $\overline{\text{clr}(p)}$ | Prev. [%] |
| Penicillium chrysogenum      | 1           | 2.66           | 1381.18                    | 100.00    | 1533         | 0.01           | 26.63                      | 31.25     |
| Lecanosticta acicola         | 2           | 1.80           | 1323.86                    | 100.00    | 1312         | 0.01           | 57.29                      | 37.50     |
| Penicillium fuscoglaucum     | 3           | 1.16           | 1261.37                    | 100.00    | 1607         | 0.00           | 18.22                      | 25.00     |
| Rhodotorula glutinis         | 4           | 1.00           | 1239.20                    | 100.00    | 789          | 0.02           | 163.17                     | 43.75     |
| Penicillium nalgiovense      | 5           | 0.68           | 1184.63                    | 100.00    | 1738         | 0.01           | 3.34                       | 18.75     |
| Staphylococcus saprophyticus | 6           | 1.63           | 1172.15                    | 90.48     | 10           | 1.05           | 1020.44                    | 100.00    |
| Puccinia striiformis         | 7           | 0.47           | 1129.02                    | 100.00    | 89           | 0.09           | 657.63                     | 100.00    |
| Rhodospodium toruloides      | 8           | 0.35           | 1085.92                    | 100.00    | 1284         | 0.04           | 61.70                      | 25.00     |
| Klebsiella pneumoniae        | 9           | 0.85           | 1053.44                    | 85.71     | 137          | 0.05           | 572.56                     | 100.00    |
| Staphylococcus epidermidis   | 10          | 0.22           | 1020.98                    | 100.00    | 2            | 7.59           | 1305.54                    | 100.00    |
| Staphylococcus aureus        | 11          | 0.30           | 1019.64                    | 95.24     | 8            | 1.12           | 1029.71                    | 100.00    |
| Penicillium roqueforti       | 12          | 0.23           | 973.22                     | 95.24     | 2158         | 0.02           | -26.66                     | 12.50     |
| Penicillium bifforme         | 13          | 0.20           | 958.21                     | 95.24     | 2365         | 0.02           | -40.87                     | 12.50     |
| Penicillium digitatum        | 14          | 0.77           | 953.92                     | 80.95     | 325          | 0.03           | 388.12                     | 81.25     |
| Aspergillus niger            | 15          | 0.14           | 911.03                     | 95.24     | 672          | 0.01           | 201.61                     | 62.50     |
| Staphylococcus hominis       | 18          | 0.09           | 888.93                     | 100.00    | 6            | 1.19           | 1038.51                    | 100.00    |
| Propionibacterium acnes      | 22          | 0.07           | 854.85                     | 100.00    | 1            | 17.87          | 1429.10                    | 100.00    |
| Staphylococcus capitis       | 58          | 0.04           | 647.83                     | 85.71     | 4            | 2.49           | 1144.35                    | 100.00    |
| Malassezia restricta         | 74          | 0.01           | 602.57                     | 100.00    | 3            | 2.68           | 1155.52                    | 100.00    |
| Staphylococcus sp. AL1       | 80          | 0.03           | 590.95                     | 80.95     | 15           | 0.70           | 962.02                     | 100.00    |
| Corynebacterium sp. GD7      | 138         | 0.01           | 496.07                     | 85.71     | 5            | 1.75           | 1094.56                    | 100.00    |
| Haemophilus parainfluenzae   | 152         | 0.01           | 486.70                     | 90.48     | 7            | 1.13           | 1030.88                    | 100.00    |
| Streptococcus mitis          | 191         | 0.01           | 449.32                     | 85.71     | 9            | 1.05           | 1020.94                    | 100.00    |
| Rothia mucilaginosa          | 203         | 0.01           | 435.85                     | 76.19     | 13           | 0.80           | 981.45                     | 100.00    |
| Streptococcus sanguinis      | 213         | 0.01           | 426.56                     | 80.95     | 14           | 0.74           | 969.31                     | 100.00    |
| Micrococcus luteus           | 431         | 0.01           | 292.78                     | 66.67     | 12           | 0.81           | 982.21                     | 100.00    |
| Lactococcus lactis           | 515         | 0.00           | 251.49                     | 71.43     | 11           | 0.83           | 986.76                     | 100.00    |

### 3.5.2 No PMA

| genus             | Flights 1-3 |                |                            |           | Flights 4, 5 |                |                            |           |
|-------------------|-------------|----------------|----------------------------|-----------|--------------|----------------|----------------------------|-----------|
|                   | rank        | Cen( $p$ ) [%] | $\overline{\text{clr}(p)}$ | Prev. [%] | rank         | Cen( $p$ ) [%] | $\overline{\text{clr}(p)}$ | Prev. [%] |
| Staphylococcus    | 1           | 27.20          | 1628.25                    | 100.00    | 2            | 26.58          | 1914.54                    | 100.00    |
| Penicillium       | 2           | 22.79          | 1602.73                    | 100.00    | 64           | 0.02           | 847.84                     | 100.00    |
| Propionibacterium | 3           | 11.86          | 1508.44                    | 100.00    | 1            | 46.64          | 1995.67                    | 100.00    |
| Methylobacterium  | 4           | 5.25           | 1390.63                    | 100.00    | 44           | 0.04           | 987.68                     | 100.00    |
| Streptococcus     | 5           | 2.66           | 1292.82                    | 100.00    | 3            | 9.07           | 1759.34                    | 100.00    |
| Pantoea           | 6           | 2.43           | 1280.16                    | 100.00    | 82           | 0.01           | 766.70                     | 100.00    |
| Klebsiella        | 7           | 1.94           | 1248.18                    | 100.00    | 58           | 0.02           | 887.81                     | 100.00    |
| Lecanosticta      | 8           | 1.87           | 1242.04                    | 100.00    | 290          | 0.00           | 233.14                     | 93.75     |
| Aspergillus       | 9           | 1.61           | 1220.10                    | 100.00    | 68           | 0.01           | 828.12                     | 100.00    |
| Enterobacter      | 10          | 1.56           | 1215.47                    | 100.00    | 54           | 0.03           | 911.26                     | 100.00    |
| Corynebacterium   | 11          | 1.27           | 1186.41                    | 100.00    | 4            | 4.22           | 1649.06                    | 100.00    |
| Actinomyces       | 12          | 1.03           | 1155.98                    | 100.00    | 5            | 1.87           | 1531.81                    | 100.00    |
| Puccinia          | 13          | 0.78           | 1116.09                    | 100.00    | 43           | 0.04           | 988.55                     | 100.00    |
| Rhodotorula       | 14          | 0.54           | 1063.84                    | 100.00    | 200          | 0.00           | 379.33                     | 87.50     |
| Pseudomonas       | 15          | 0.53           | 1059.50                    | 100.00    | 13           | 0.49           | 1338.90                    | 100.00    |
| Veillonella       | 18          | 0.34           | 995.74                     | 100.00    | 8            | 1.09           | 1454.37                    | 100.00    |
| Malassezia        | 19          | 0.31           | 984.17                     | 100.00    | 9            | 0.69           | 1386.93                    | 100.00    |
| Haemophilus       | 20          | 0.30           | 978.12                     | 100.00    | 6            | 1.20           | 1467.60                    | 100.00    |
| Neisseria         | 22          | 0.31           | 922.73                     | 95.24     | 7            | 1.13           | 1458.87                    | 100.00    |
| Rothia            | 23          | 0.20           | 919.09                     | 100.00    | 10           | 0.67           | 1383.01                    | 100.00    |
| Prevotella        | 36          | 0.06           | 753.82                     | 100.00    | 11           | 0.56           | 1357.77                    | 100.00    |
| Gemella           | 37          | 0.05           | 729.36                     | 100.00    | 12           | 0.49           | 1339.18                    | 100.00    |
| Lautropia         | 45          | 0.08           | 687.09                     | 90.48     | 15           | 0.37           | 1297.45                    | 100.00    |
| Fusobacterium     | 56          | 0.03           | 639.96                     | 100.00    | 14           | 0.41           | 1313.87                    | 100.00    |

### 3 Prevalence and Abundance

| species                      | Flights 1-3 |                |            |           | Flights 4, 5 |                |            |           |
|------------------------------|-------------|----------------|------------|-----------|--------------|----------------|------------|-----------|
|                              | rank        | Cen( $p$ ) [%] | clr( $p$ ) | Prev. [%] | rank         | Cen( $p$ ) [%] | clr( $p$ ) | Prev. [%] |
| Penicillium chrysogenum      | 1           | 2.70           | 1333.75    | 100.00    | 867          | 0.00           | 290.09     | 87.50     |
| Lecanosticta acicola         | 2           | 2.17           | 1302.36    | 100.00    | 873          | 0.00           | 286.04     | 93.75     |
| Propionibacterium acnes      | 3           | 1.31           | 1229.65    | 100.00    | 2            | 14.14          | 1654.07    | 100.00    |
| Staphylococcus saprophyticus | 4           | 1.26           | 1223.59    | 100.00    | 6            | 2.30           | 1392.11    | 100.00    |
| Penicillium fuscoglaucum     | 5           | 1.26           | 1223.51    | 100.00    | 1254         | 0.00           | 155.22     | 68.75     |
| Klebsiella pneumoniae        | 6           | 0.86           | 1168.33    | 100.00    | 266          | 0.02           | 700.98     | 100.00    |
| Staphylococcus epidermidis   | 7           | 0.84           | 1165.93    | 100.00    | 1            | 15.35          | 1665.99    | 100.00    |
| Staphylococcus aureus        | 8           | 0.76           | 1152.53    | 100.00    | 13           | 1.51           | 1331.10    | 100.00    |
| Penicillium nalgiovense      | 9           | 0.76           | 1151.62    | 100.00    | 1356         | 0.00           | 133.28     | 68.75     |
| Rhodotorula glutinis         | 10          | 0.63           | 1124.71    | 100.00    | 593          | 0.01           | 432.33     | 87.50     |
| Puccinia striiformis         | 11          | 0.58           | 1112.83    | 100.00    | 179          | 0.04           | 816.04     | 100.00    |
| Staphylococcus hominis       | 12          | 0.37           | 1046.38    | 100.00    | 9            | 2.10           | 1379.31    | 100.00    |
| Penicillium digitatum        | 13          | 0.43           | 1013.16    | 95.24     | 343          | 0.01           | 623.84     | 100.00    |
| Aspergillus niger            | 14          | 0.38           | 994.35     | 95.24     | 627          | 0.00           | 408.42     | 93.75     |
| Malassezia restricta         | 15          | 0.22           | 971.47     | 100.00    | 7            | 2.22           | 1386.95    | 100.00    |
| Haemophilus parainfluenzae   | 16          | 0.22           | 970.53     | 100.00    | 3            | 3.80           | 1464.47    | 100.00    |
| Corynebacterium sp. GD7      | 20          | 0.17           | 936.46     | 100.00    | 4            | 3.59           | 1456.19    | 100.00    |
| Rothia mucilaginosa          | 21          | 0.17           | 935.73     | 100.00    | 14           | 1.48           | 1328.94    | 100.00    |
| Streptococcus sanguinis      | 31          | 0.15           | 876.74     | 95.24     | 12           | 1.58           | 1337.58    | 100.00    |
| Staphylococcus capitis       | 34          | 0.09           | 837.61     | 100.00    | 5            | 3.32           | 1445.19    | 100.00    |
| Streptococcus mitis          | 45          | 0.06           | 776.76     | 100.00    | 8            | 2.16           | 1383.06    | 100.00    |
| Lautropia mirabilis          | 54          | 0.09           | 747.69     | 90.48     | 10           | 1.71           | 1349.23    | 100.00    |
| Staphylococcus caprae        | 96          | 0.03           | 640.11     | 95.24     | 15           | 1.25           | 1304.10    | 100.00    |
| Staphylococcus pettenkoferi  | 131         | 0.04           | 571.54     | 80.95     | 11           | 1.66           | 1345.39    | 100.00    |

### 3.6 Caveats

1. We must keep in mind that genome sizes vary between and even within species, and that cells may contain multiple genome copies (polyploidy). Cellular and DNA abundance as measured by read counts are not equivalent. Cells preparing for division complicate estimates by replicating DNA near origins of replication.
2. Additionally, read counts are “count-compositional” data because they are whole numbers constrained to sum to a total (library size) that is typically limited by the instrument and non-trivially affected by sample preparation and chance. In other words, they may be treated as proportions, specifically as proportions of detectable taxa, with the understanding that information about precision of the measurement and variance may be lost in the division and subsequent transformations.
3. Taxon read counts may also be modeled as discrete counts from negative binomial (gamma poisson) distributions. However, in both cases, misspecifying the model has been shown to inflate the false discovery rate.
4. *Propionibacterium* has been reorganized into 4 genera including *Cutibacterium*.

## 4 Alpha diversity

### 4.1 Richness and Evenness

Richness and evenness of taxa describe compositional diversity. We measure it in our samples and use these measurements to estimate the diversity of an environment, perhaps over time.

Richness can be used to investigate “How many species does this environment support?” Evenness asks “Are all species equally dominant?”

Common diversity indices such as richness, Shannon, and Simpson indices correspond to special cases of generalized weighted means and Renyí entropies of degrees 0, 1, and 2 respectively and Hill numbers  $N_0$ ,  $N_1$ ,  $N_2$ .

We use `vegan::renyi(hill = TRUE)` to estimate Hill numbers which represent the expected “effective” number of species according to their abundances.

### 4.2 $N_1$ vs. mapped microbial reads

Sequencing deeper may detect more low abundance species. Additionally, score and abundance thresholds, and mapping approach, and reference databases affect how species are counted.

#### 4.2.1 Crew

```
#> `geom_smooth()` using method = 'loess' and formula 'y ~ x'  
#> `geom_smooth()` using method = 'loess' and formula 'y ~ x'  
#> `geom_smooth()` using method = 'loess' and formula 'y ~ x'
```

## 4 Alpha diversity

### A Genus Richness

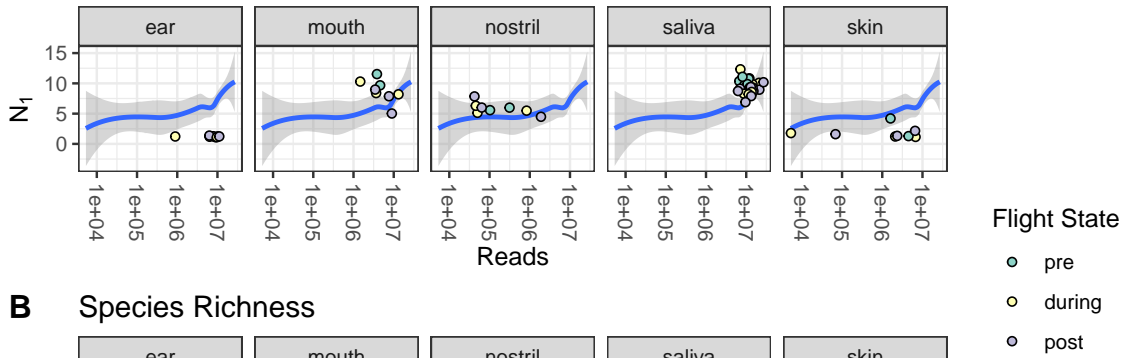

### B Species Richness

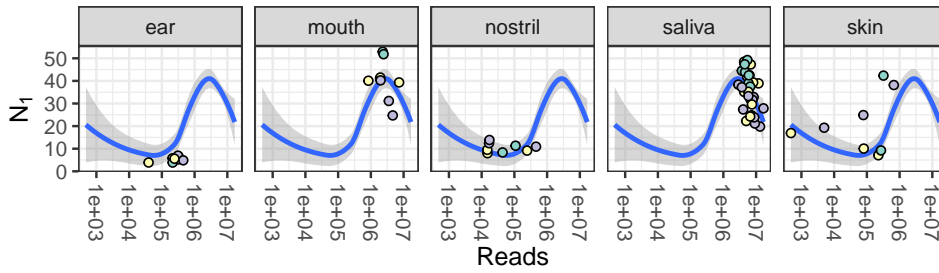

## 4.2.2 Surfaces

```
#> `geom_smooth()` using method = 'loess' and formula 'y ~ x'
#> `geom_smooth()` using method = 'loess' and formula 'y ~ x'
#> `geom_smooth()` using method = 'loess' and formula 'y ~ x'
```

### A Genus Richness

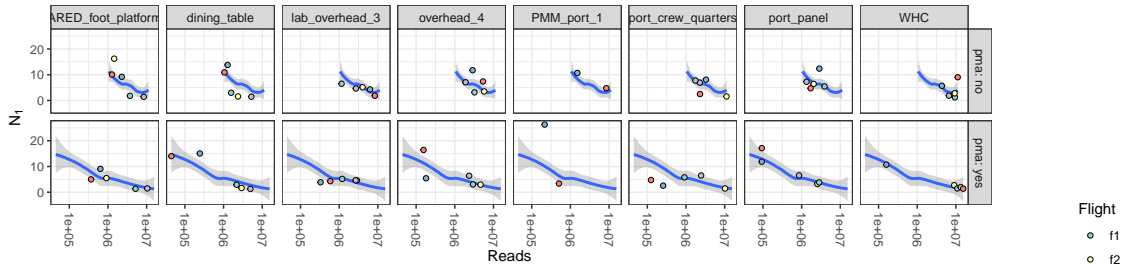

### B Species Richness

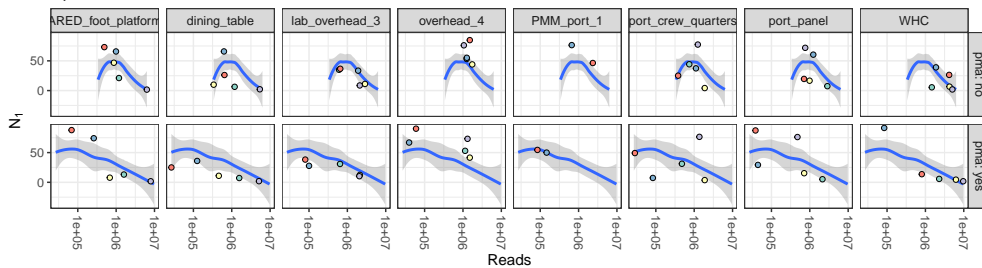

### 4.3 Effective counts of taxa

Hill numbers capture evenness by weighting counts by taxon proportion [1]:  
 $\exp(\text{Shannon}) = N_1$ ,  $\text{Simpson}^{-1} = N_2$ .

In this way, evenness can also be framed as counts of taxa that are weighted by their relative abundances. A perfectly uniformly distributed sample will equally weight all taxa, whereas a skewed sample will downweight rare taxa, resulting in smaller effective counts.

#### 4.3.1 Crew

##### A Genus Alpha-diversity

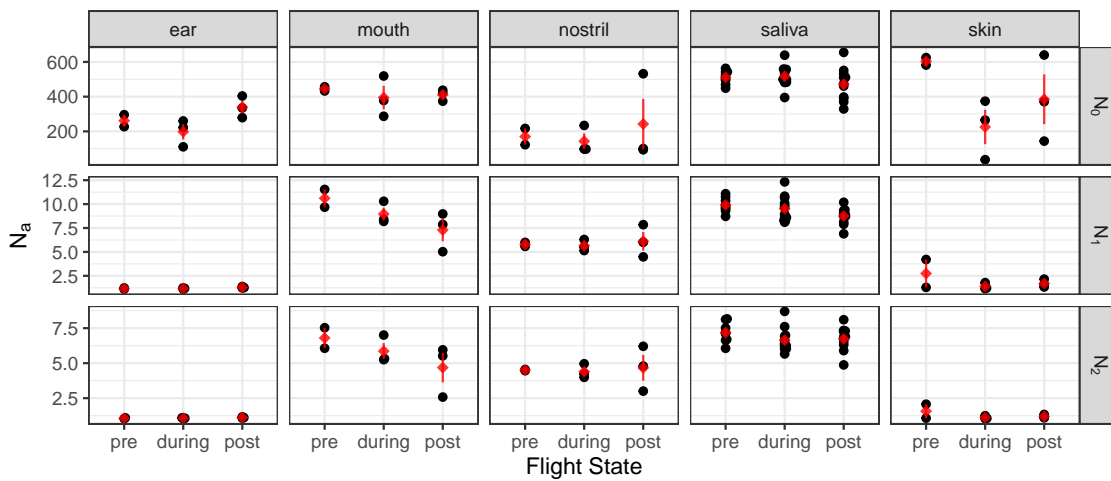

##### B Species Alpha-diversity

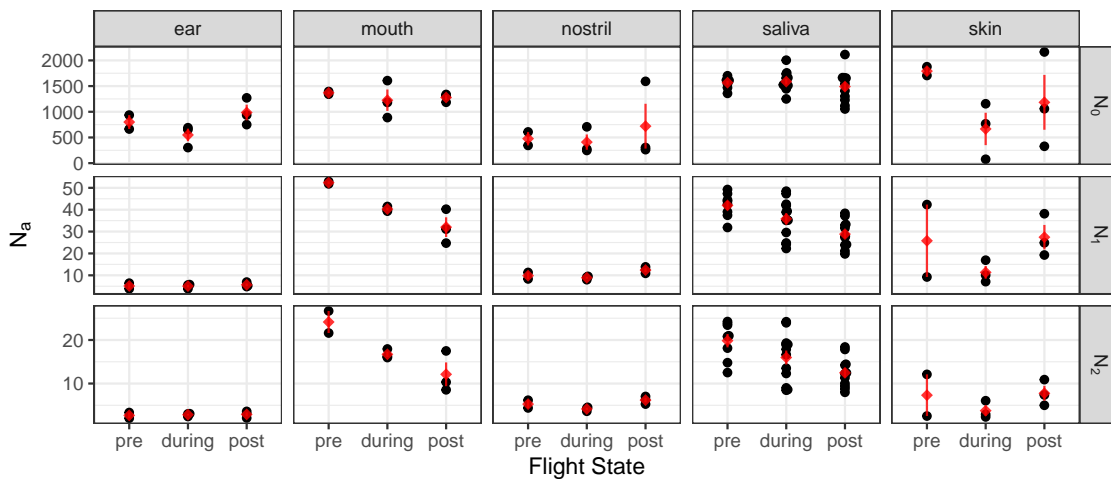

4 Alpha diversity

4.3.2 Surfaces

#> Warning: Removed 111 rows containing missing values (geom\_pointrange).

#> Warning: Removed 111 rows containing missing values (geom\_pointrange).

#> Warning: Removed 111 rows containing missing values (geom\_pointrange).

A Genus Alpha-diversity

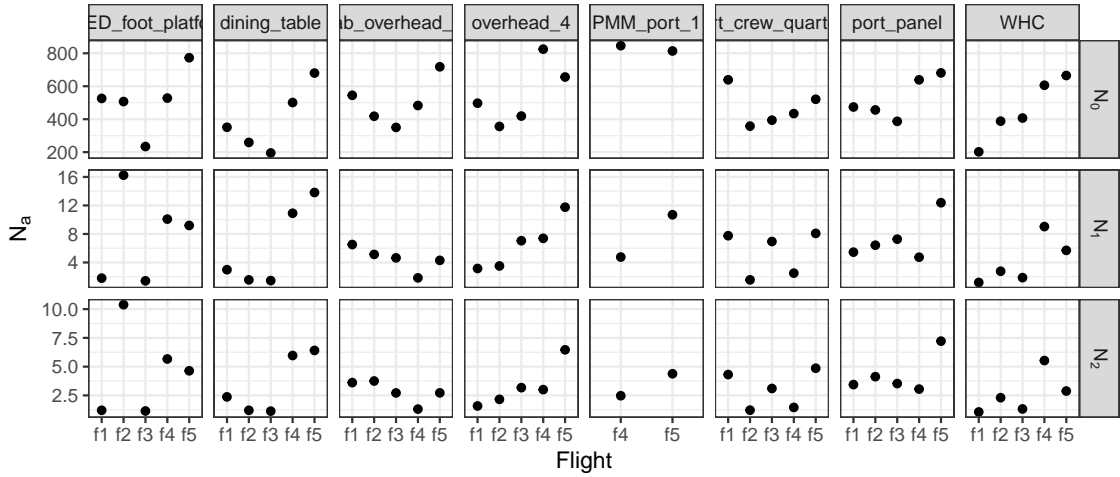

B Species Alpha-diversity

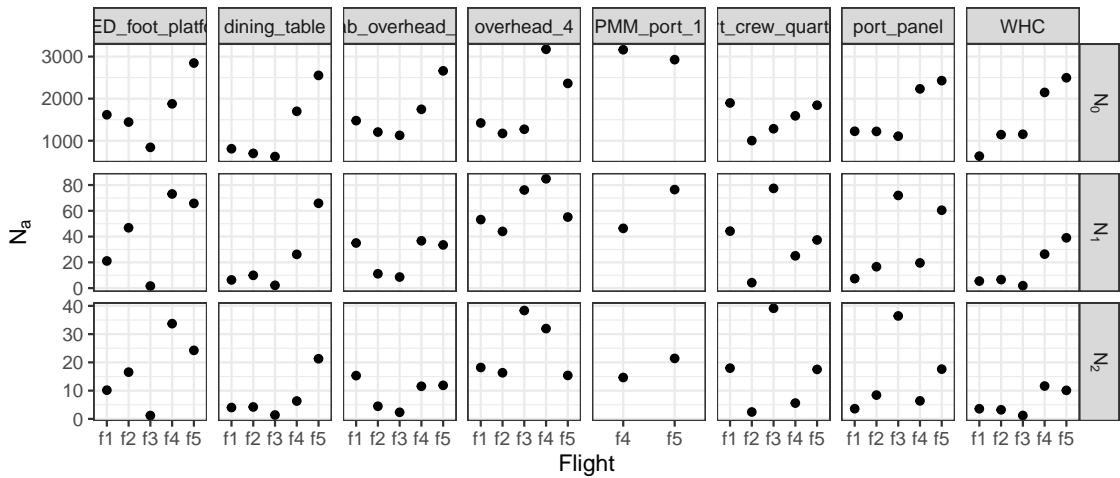

#> Warning: Removed 111 rows containing missing values (geom\_pointrange).

#> Warning: Removed 111 rows containing missing values (geom\_pointrange).

#> Warning: Removed 111 rows containing missing values (geom\_pointrange).

**A** Genus Alpha-diversity

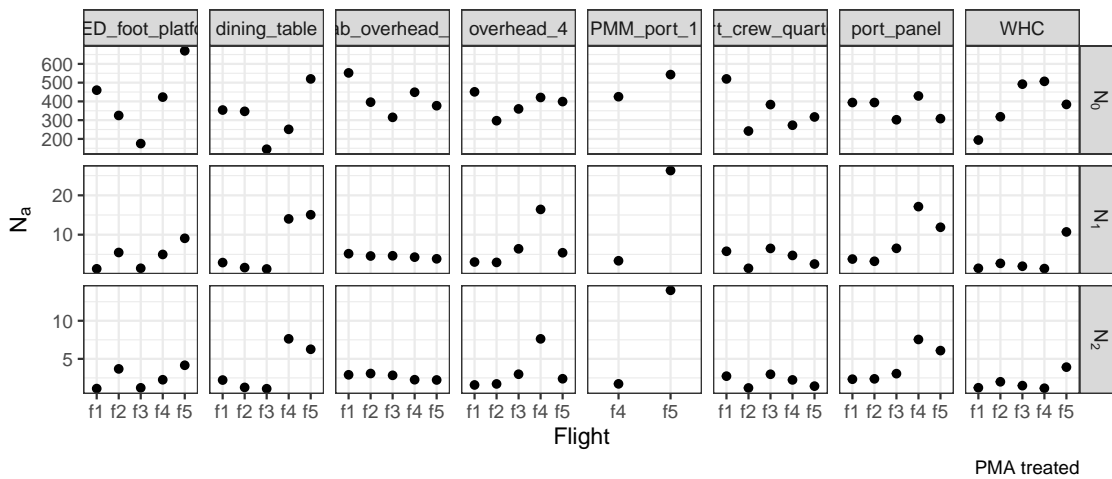

**B** Species Alpha-diversity

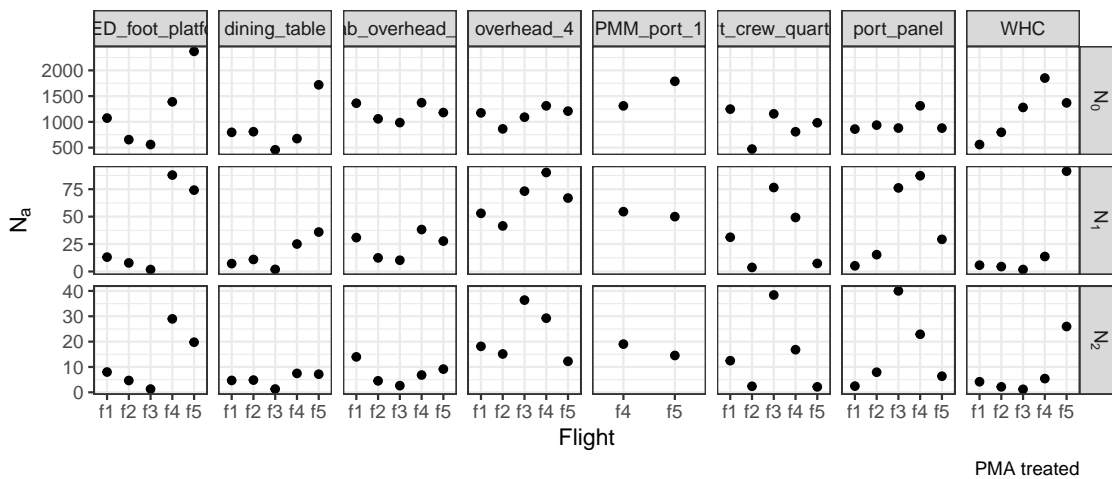

**4.4 Saliva  $\alpha$ -diversity**

#> Warning: Removed 93 rows containing missing values (geom\_pointrange).

#> Warning: Removed 93 rows containing missing values (geom\_pointrange).

#> Warning: Removed 93 rows containing missing values (geom\_pointrange).

## 4 Alpha diversity

### A Genus Alpha-diversity

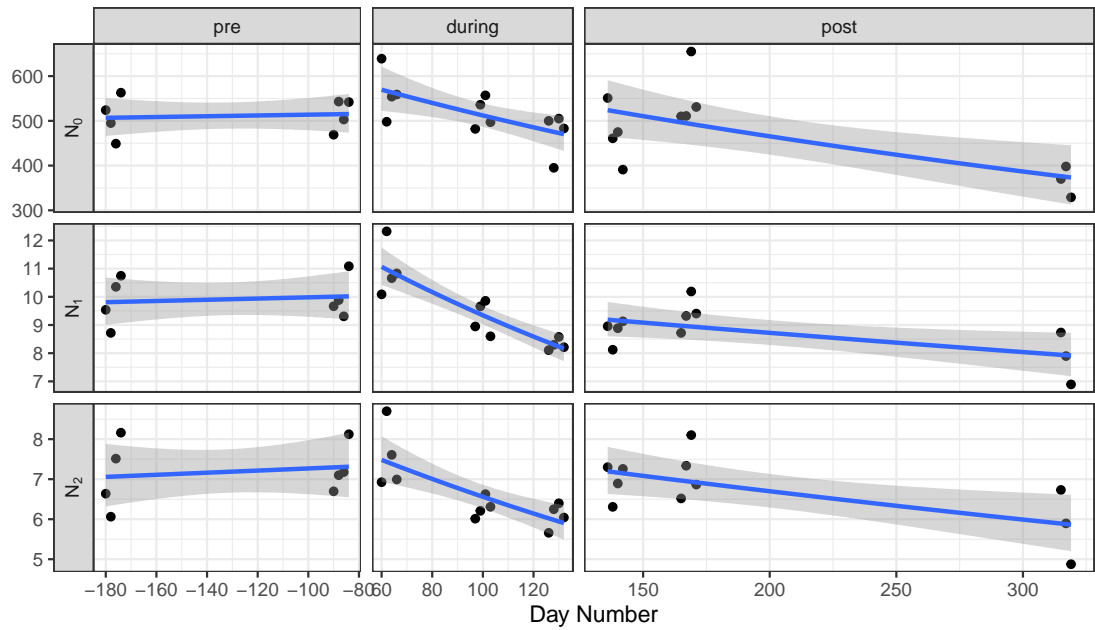

### B Species Alpha-diversity

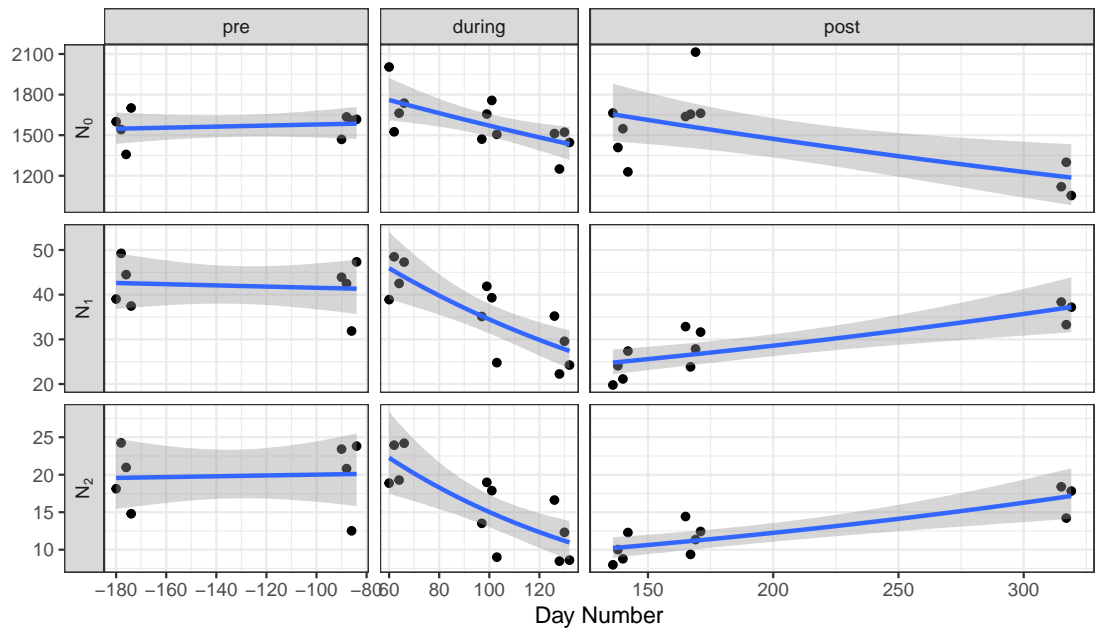

```
#> Warning: Removed 93 rows containing missing values (geom_pointrange).
```

#### 4.4.1 Species $N_1$

```
#> Warning: Removed 31 rows containing missing values (geom_pointrange).
```



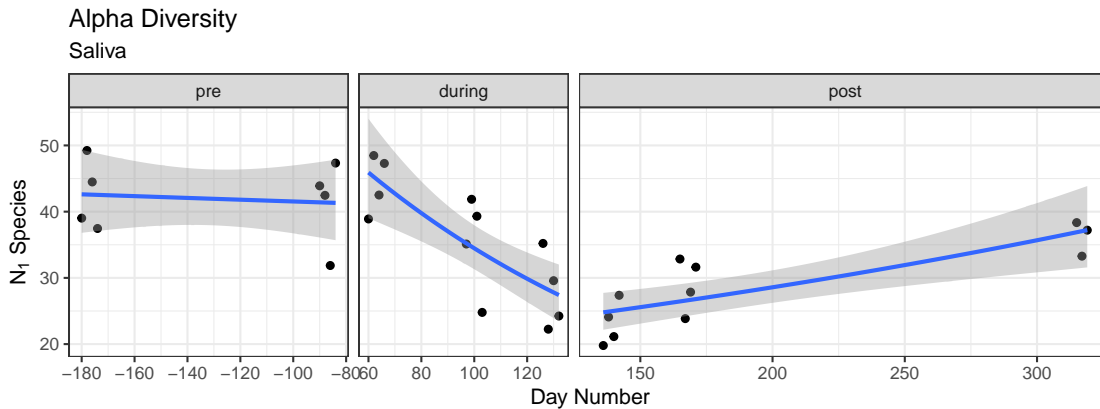

```
#> Warning: Removed 31 rows containing missing values (geom_pointrange).
```

#### 4.4.2 Test effect of day\_number and sum\_reads

We fit a model for each flight state (pre, during, post) for each alpha diversity measure ( $N_0$ ,  $N_1$ ,  $N_2$ ) of genus and species read counts ( $3 \times 3 \times 2 = 18$  models). We fit a Gamma GLM with a log link function because the Hill numbers are non-negative. We include the day number and the number of mapped reads as predictors of Hill number.

For each model, we compare it to a model which drops either term by visually inspecting the change in effect sizes and performing a likelihood ratio test to identify terms that “significantly” affect model fit.

```
#> # A tibble: 18 x 5
#>   tax_rank flight_status a      data      model
#>   <chr>     <fct>      <chr> <list>      <list>
#> 1 genus    during      N_0    <tibble [12 x 3]> <glm>
#> 2 genus    pre         N_0    <tibble [8 x 3]>  <glm>
#> 3 genus    post        N_0    <tibble [11 x 3]> <glm>
#> 4 species during      N_0    <tibble [12 x 3]> <glm>
#> 5 species pre         N_0    <tibble [8 x 3]>  <glm>
#> 6 species post        N_0    <tibble [11 x 3]> <glm>
#> 7 genus    during      N_1    <tibble [12 x 3]> <glm>
#> 8 genus    pre         N_1    <tibble [8 x 3]>  <glm>
#> 9 genus    post        N_1    <tibble [11 x 3]> <glm>
#> 10 species during      N_1    <tibble [12 x 3]> <glm>
#> 11 species pre         N_1    <tibble [8 x 3]>  <glm>
#> 12 species post        N_1    <tibble [11 x 3]> <glm>
#> 13 genus    during      N_2    <tibble [12 x 3]> <glm>
#> 14 genus    pre         N_2    <tibble [8 x 3]>  <glm>
```

#### 4 Alpha diversity

```
#> 15 genus      post      N_2  <tibble [11 x 3]> <glm>
#> 16 species  during    N_2  <tibble [12 x 3]> <glm>
#> 17 species   pre      N_2  <tibble [8 x 3]>  <glm>
#> 18 species   post     N_2  <tibble [11 x 3]> <glm>
```

```
#> Joining, by = c("tax_rank", "flight_status", "a", "term")
```

#### 4.4 Saliva $\alpha$ -diversity

4 Alpha diversity

4.4.2.1 Fitted vs. Observed

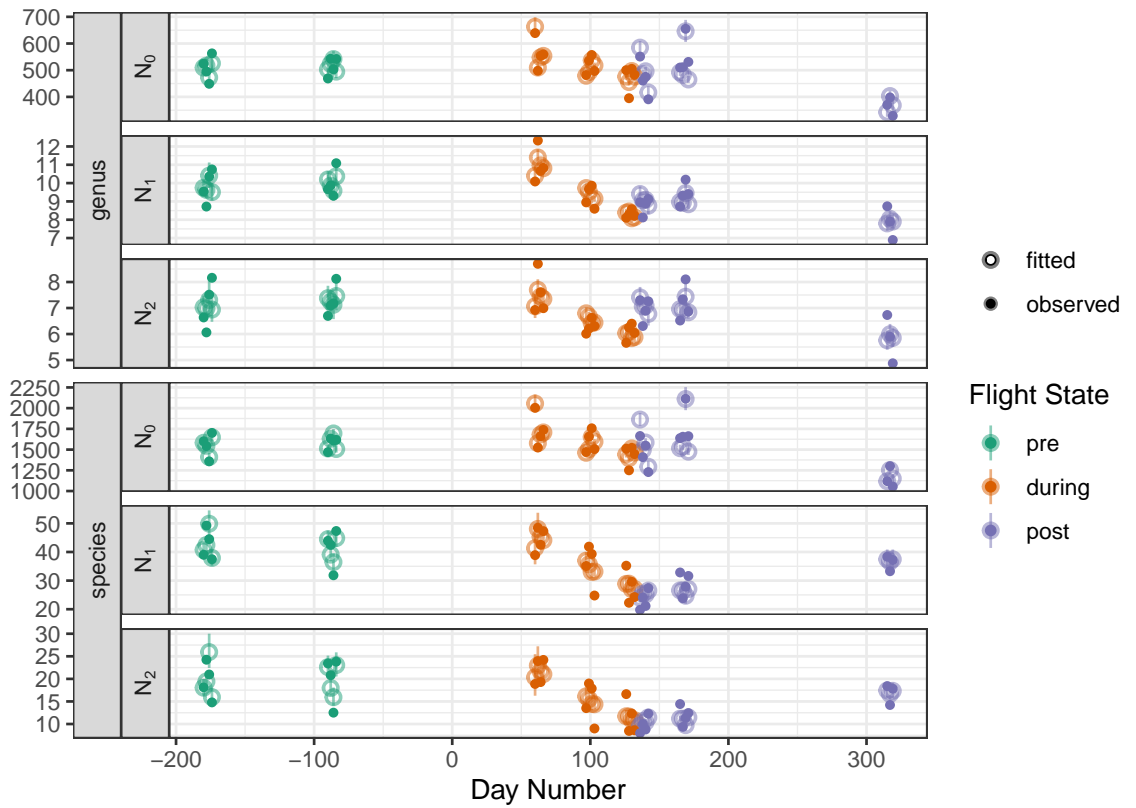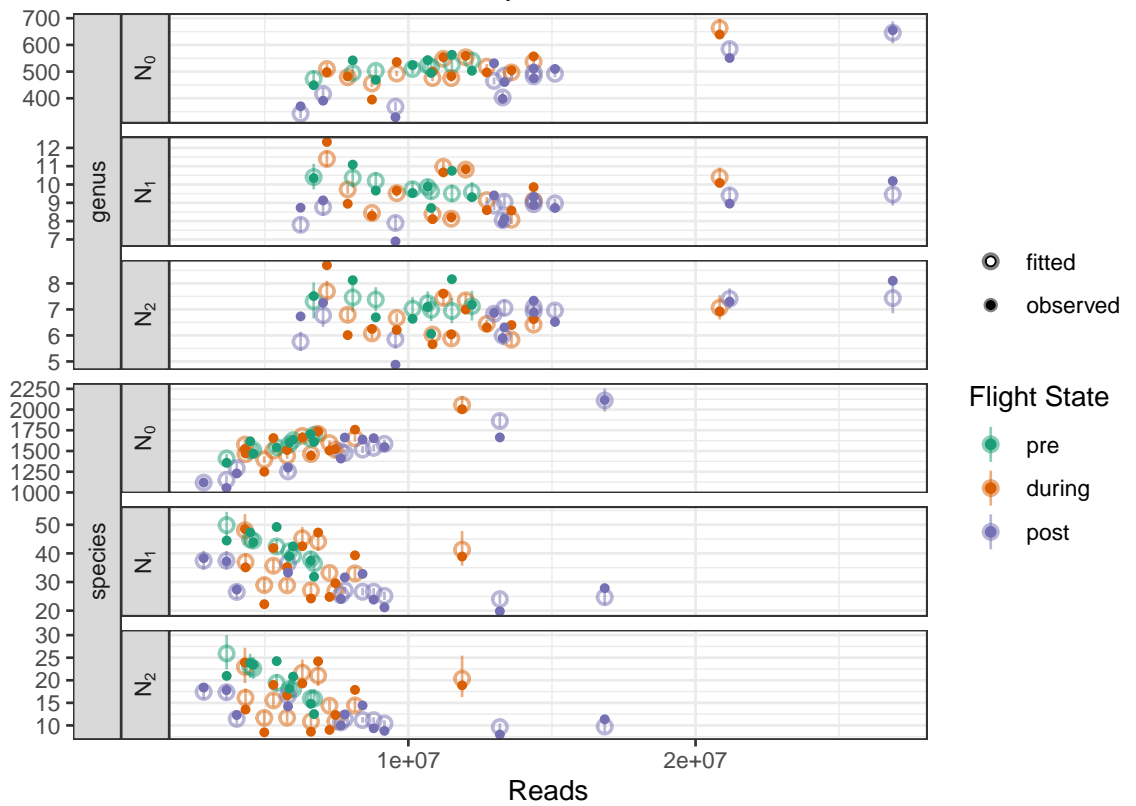

#### 4.4 Saliva $\alpha$ -diversity

| tax_rank | flight_status | a   | term       | estimate   | std.error | p.value   | padj      |
|----------|---------------|-----|------------|------------|-----------|-----------|-----------|
| species  | during        | N_2 | day_number | -0.0100868 | 0.0028842 | 0.0004351 | 0.0019581 |
| species  | during        | N_1 | day_number | -0.0074704 | 0.0018885 | 0.0000755 | 0.0005436 |
| genus    | during        | N_1 | day_number | -0.0043703 | 0.0006317 | 0.0000000 | 0.0000000 |
| genus    | during        | N_2 | day_number | -0.0034245 | 0.0008426 | 0.0000338 | 0.0003042 |
| species  | post          | N_2 | day_number | 0.0023132  | 0.0008397 | 0.0057506 | 0.0172518 |
| species  | during        | N_0 | day_number | -0.0022024 | 0.0006643 | 0.0009746 | 0.0038986 |
| genus    | during        | N_0 | day_number | -0.0021598 | 0.0006629 | 0.0011488 | 0.0041356 |
| species  | post          | N_1 | day_number | 0.0019303  | 0.0007405 | 0.0091799 | 0.0236055 |
| genus    | post          | N_0 | day_number | -0.0010259 | 0.0003734 | 0.0070713 | 0.0195821 |
| genus    | post          | N_2 | day_number | -0.0009119 | 0.0004783 | 0.0592297 | 0.1254275 |
| genus    | post          | N_1 | day_number | -0.0006549 | 0.0003873 | 0.0942377 | 0.1884755 |
| species  | post          | N_0 | day_number | -0.0005777 | 0.0004076 | 0.1604036 | 0.2887264 |
| genus    | pre           | N_2 | day_number | 0.0003839  | 0.0009237 | 0.6778374 | 0.7624761 |
| species  | pre           | N_1 | day_number | -0.0003230 | 0.0009025 | 0.7201163 | 0.7624761 |
| species  | pre           | N_0 | day_number | 0.0002473  | 0.0003720 | 0.5056763 | 0.6277361 |
| genus    | pre           | N_1 | day_number | 0.0002388  | 0.0006543 | 0.7150514 | 0.7624761 |
| species  | pre           | N_2 | day_number | 0.0001928  | 0.0014758 | 0.8959953 | 0.8959953 |
| genus    | pre           | N_0 | day_number | 0.0001636  | 0.0006125 | 0.7889769 | 0.8115191 |
| species  | pre           | N_2 | sum_reads  | -0.0000002 | 0.0000001 | 0.0169357 | 0.0406457 |
| species  | pre           | N_1 | sum_reads  | -0.0000001 | 0.0000000 | 0.0239615 | 0.0539133 |
| species  | pre           | N_0 | sum_reads  | 0.0000001  | 0.0000000 | 0.0014777 | 0.0048362 |
| species  | post          | N_0 | sum_reads  | 0.0000000  | 0.0000000 | 0.0000002 | 0.0000030 |
| species  | during        | N_0 | sum_reads  | 0.0000000  | 0.0000000 | 0.0001528 | 0.0009168 |
| genus    | post          | N_0 | sum_reads  | 0.0000000  | 0.0000000 | 0.0000013 | 0.0000153 |
| genus    | pre           | N_0 | sum_reads  | 0.0000000  | 0.0000000 | 0.1706297 | 0.2925081 |
| species  | during        | N_1 | sum_reads  | 0.0000000  | 0.0000000 | 0.4040761 | 0.5387681 |
| genus    | pre           | N_1 | sum_reads  | 0.0000000  | 0.0000000 | 0.2619558 | 0.4100178 |
| genus    | during        | N_0 | sum_reads  | 0.0000000  | 0.0000000 | 0.0002712 | 0.0013947 |
| species  | during        | N_2 | sum_reads  | 0.0000000  | 0.0000000 | 0.6444753 | 0.7484230 |
| species  | post          | N_2 | sum_reads  | 0.0000000  | 0.0000000 | 0.2493253 | 0.4079869 |
| genus    | pre           | N_2 | sum_reads  | 0.0000000  | 0.0000000 | 0.6402878 | 0.7484230 |
| species  | post          | N_1 | sum_reads  | 0.0000000  | 0.0000000 | 0.4751278 | 0.6108786 |
| genus    | during        | N_1 | sum_reads  | 0.0000000  | 0.0000000 | 0.1369345 | 0.2594549 |
| genus    | during        | N_2 | sum_reads  | 0.0000000  | 0.0000000 | 0.3012445 | 0.4518668 |
| genus    | post          | N_2 | sum_reads  | 0.0000000  | 0.0000000 | 0.3254293 | 0.4686182 |
| genus    | post          | N_1 | sum_reads  | 0.0000000  | 0.0000000 | 0.3423242 | 0.4739874 |

#### 4.4.3 Sensitivity of estimate

```
#> Joining, by = c("tax_rank", "flight_status", "a", "term")
```

## 4 Alpha diversity

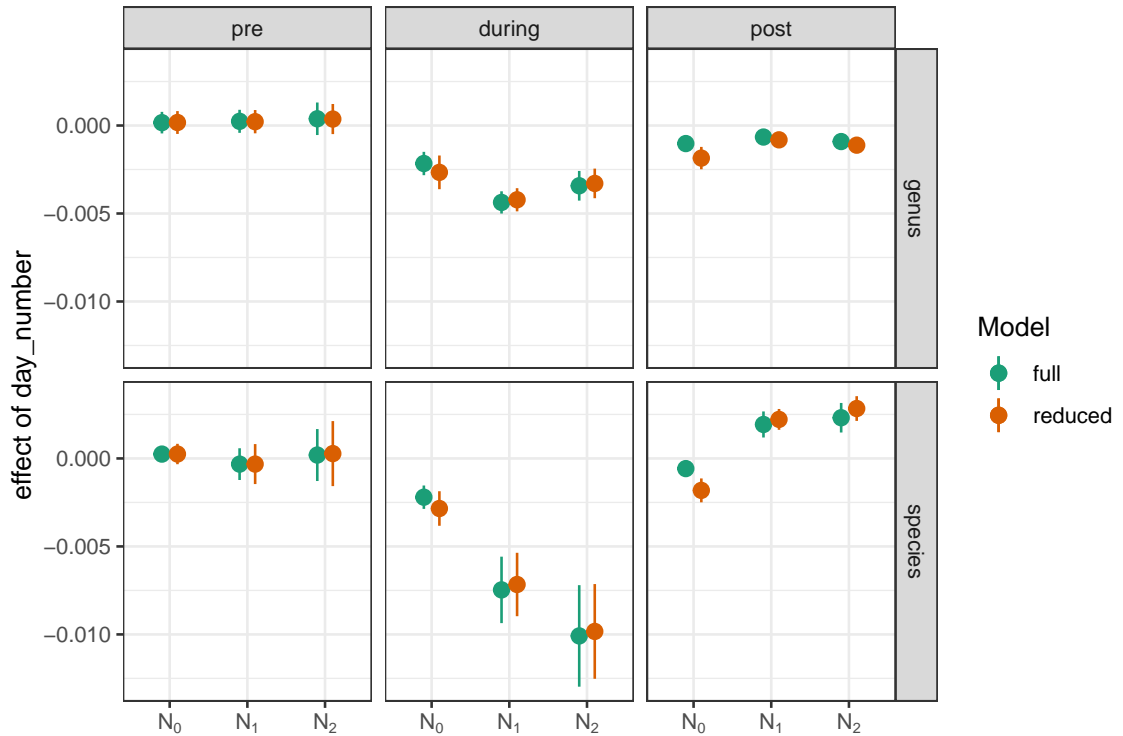

## 4.5 Caveats

Typically, taxon presence-absence and relative abundances are plugged into formulas for “true  $\alpha$ -diversity” (See Amy Willis’ work on estimating diversity).

This assumes taxa are interchangeable (i.e., phylogenetic relationships between all taxa are equivalent and that taxa behave independently). The diversity statistics are calculated per-sample and we attempt to generalize these findings to environments.

In the future, we are eager to explore methods that account for phylogenetic relationships, and non-independence between taxa such as DivNet.

Estimates of  $\alpha$ -diversity may be affected by sequencing effort. Samples which yielded fewer reads might miss less abundant species. **Species with relatively larger genomes may appear more abundant.** Additionally, database biases and mapping accuracy affect the recruitment of reads which are then used as plug-in frequencies to these calculations. Abundant species are also likely to result in highly variable measurements as there is an overdispersed mean-variance relationship in read count data.

## 5 Beta-diversity

See Nick's code for inspiration: `20180906_diversity_code.r`, `20180913_distance_jaccard_code.r`

### 5.1 Ecological distances

Beta-diversity is about how similar or different microbial compositions are between environments.

We estimate distances using pairs of samples from within and between environments. At course-grain level, samples can be thought of as binary vectors with an entry for each taxon, 1 = present, 0 = absent. We can then use the Jaccard distance or “Intersection over Union” of two sets.

We can visualize whether groups of samples from similar environments cluster together using ordination methods, and perform tests for significant ecological distances (or dissimilarities) between groups (e.g., PERMANOVA).

Additionally, we can incorporate relative abundances into our distance metric, taking care to transform relative abundances to be relative to the mean abundance rather than the sum, and to choose ordination methods for the distances/dissimilarities we have computed. An alternative approach is to test for differential abundance of each taxon between conditions as with ALDEx2.

We now take advantage of the great `phyloseq` package.

### 5.2 Ordination

#### 5.2.1 Skin-surfaces Distances

We visualize the raw pairwise distances within and between groups.

## 5 Beta-diversity

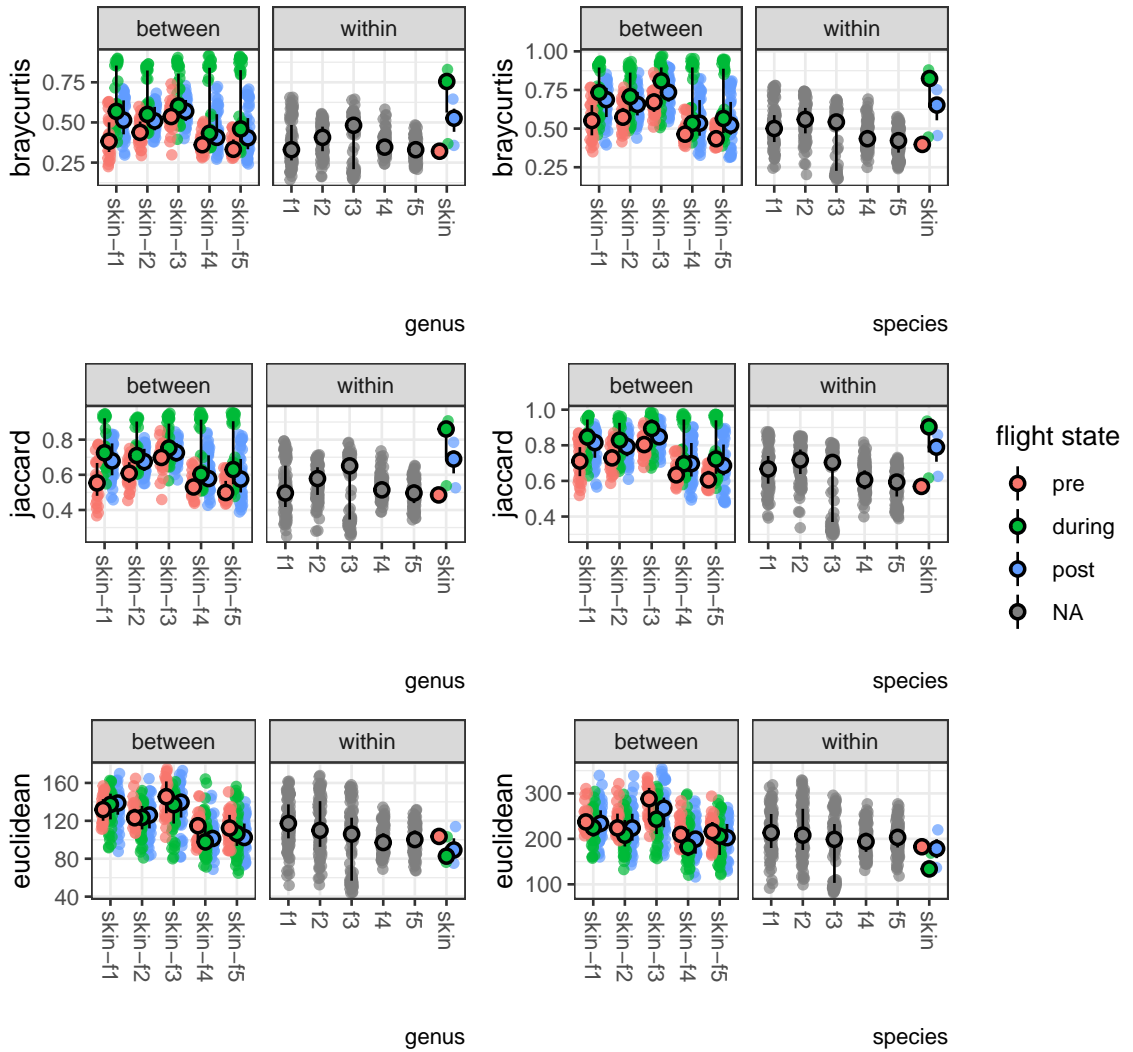

Skin-surface distances shrink from F1-3 to F4/F5 during flight. However, among pre, during, post, the during-flight distances are larger. In other words, surfaces resemble pre and post flight skin, but are different from during flight, perhaps suggesting shedding.



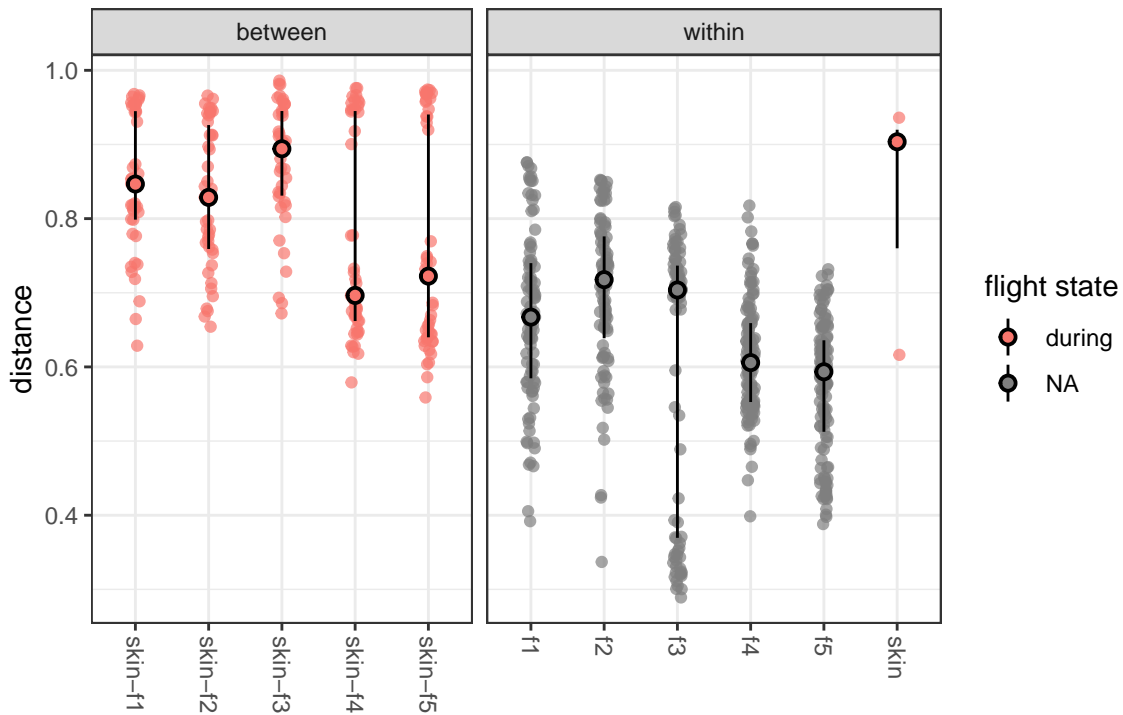

| statistic | p.value  | parameter | method                       |
|-----------|----------|-----------|------------------------------|
| 23.76938  | 8.88e-05 | 4         | Kruskal-Wallis rank sum test |

### 5.2.2 Flight 4 surfaces-bodysite Distances

Similarly, we compare within and between group distances for Flight 4 surfaces vs crewmember.

## 5 Beta-diversity

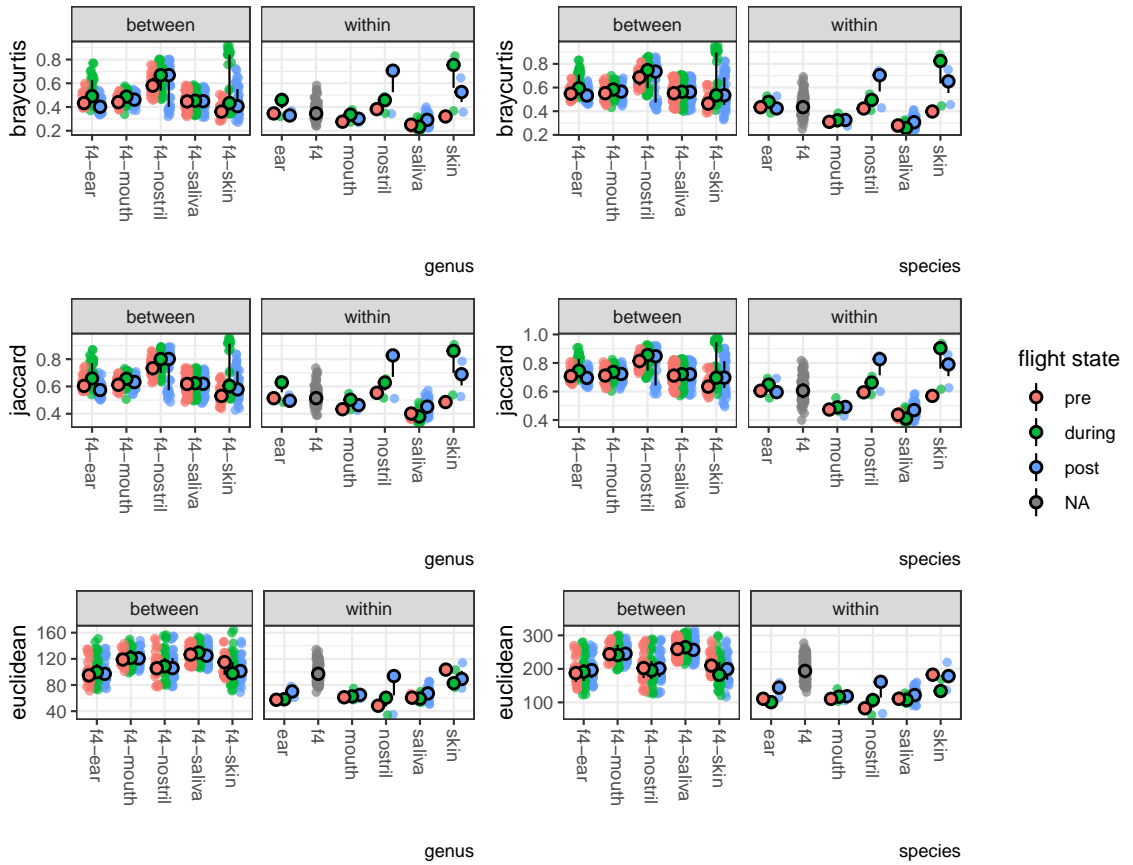

Pre-flight skin is the closest bodysite to F4. Though, there is a spike of different samples during flight.

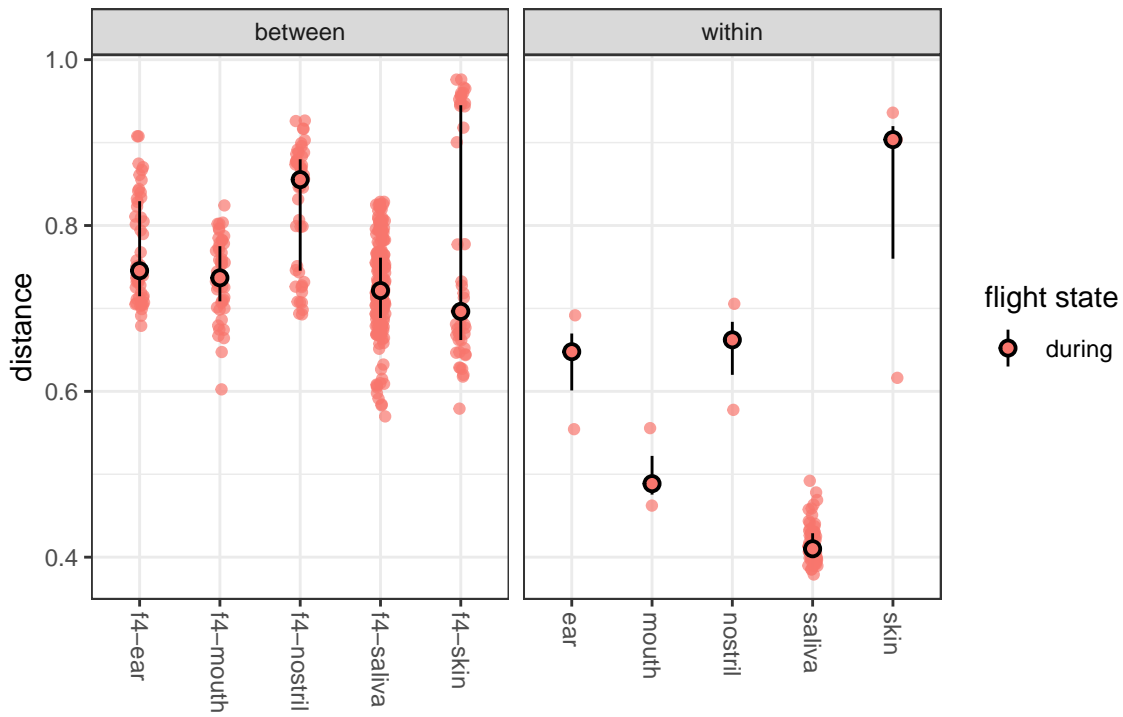

| statistic | p.value | parameter | method                       |
|-----------|---------|-----------|------------------------------|
| 55.8157   | 0       | 4         | Kruskal-Wallis rank sum test |

5 Beta-diversity

5.2.3 Jaccard - NMDS

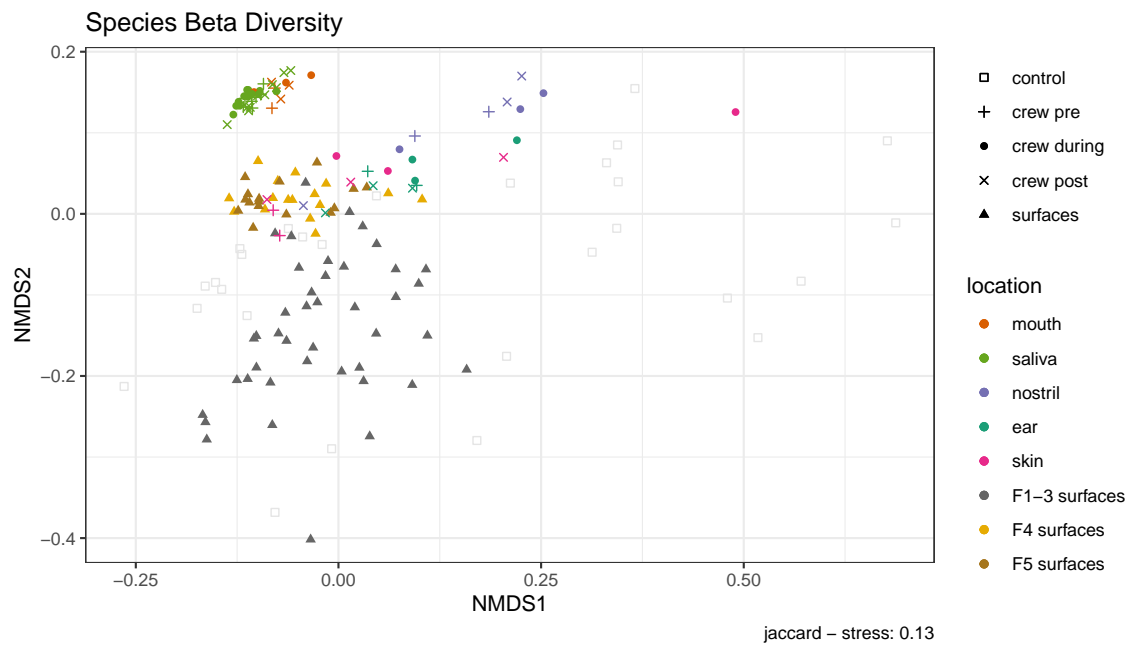

5.2.4 Euclidean - PCoA

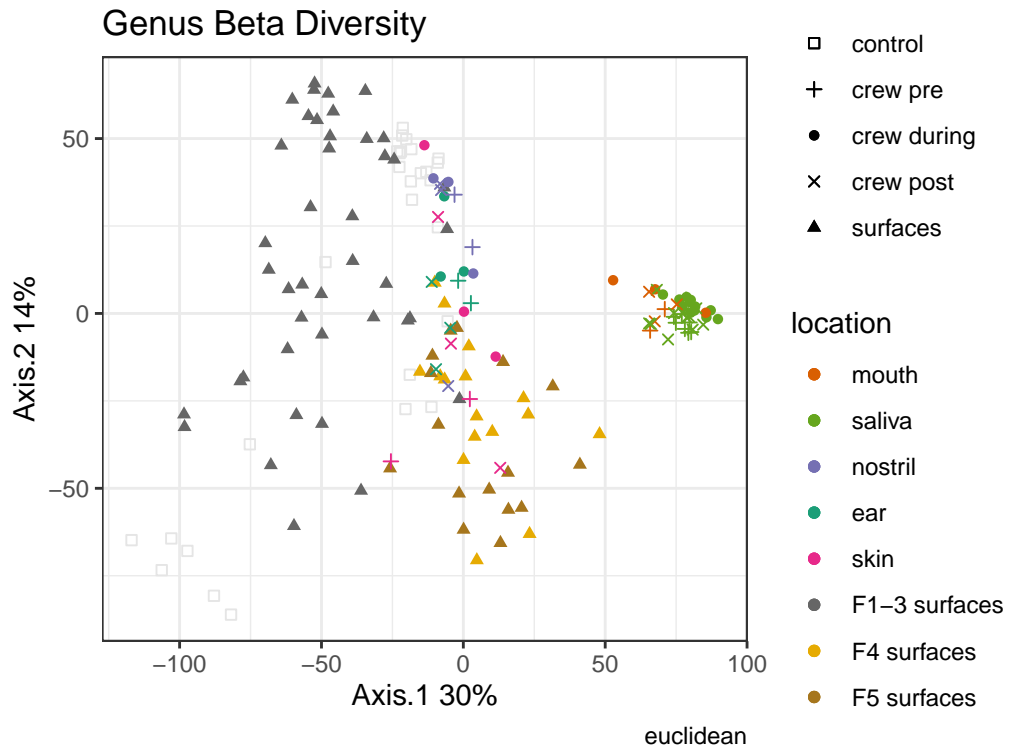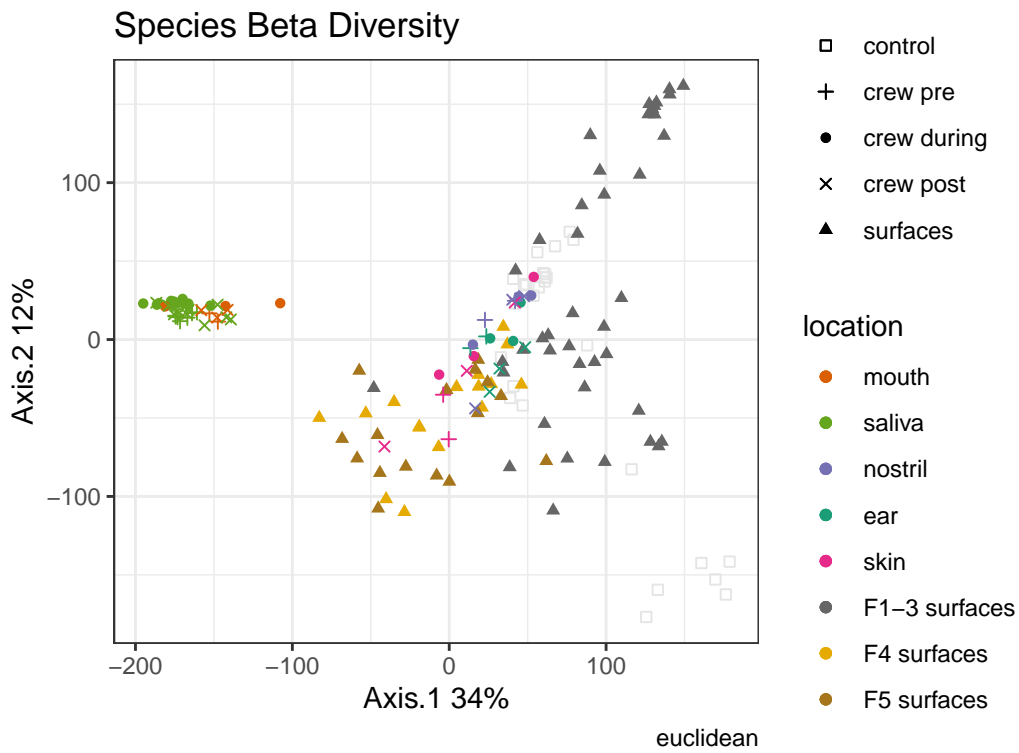

## 5.3 PERMANOVA

**Permutational multivariate analysis of variance using distance matrices (`adonis2`).**

Taxa may “prefer” one or another type of sample. We can test for this by checking if sample-sample distances (e.g., the distances used for the ordination) are larger between sample types than within sample types.

Distances between samples are larger the fewer taxa they share (or the more different their compositions are). And sample types can be defined as any grouping of samples.

### 5.3.1 Details

PERMANOVA compares the sum of squared distances within groups, among groups (i.e., between group centroids), and over the whole data set. The null hypothesis is that differences within groups are equal to or larger than among groups. `adonis2` allows for complicated designs such as when groups are nested, interact, and can include continuous variables as predictors.

The test statistic is a pseudo-F statistic which is not distributed like Fisher’s F-ratio under the null hypothesis, and thus permutations are used to estimate a p-value.

The main assumption is that the observations (sample rows) are exchangeable under the null hypothesis, i.e., observations are independent and have similar dispersions of points (similarly distributed abundances of taxon columns).

The test is a location test, but has been shown to confound location and dispersion [2]. In other words, something might be “significant”, but could result from lower variance in one group vs another. Variance and mean abundances are related in most data sets. But maybe not too much [3]

### 5.3.2 Model and data set up

We are interested in whether the apparent groupings are measurable, e.g., do Flight 4 surfaces cluster with Crew skin samples? Therefore, we partition our samples into a few more groups

- f1–3, f4, and f5 surfaces; oral, skin, ear/nose
- oral vs not oral
- f4 vs not f4
- skin and f4 surfaces vs not...
- skin and f4, f5 surfaces vs not...

Furthermore, we drop pma-treated samples and two Crew 1 skin samples with poor library peaks. See Jimmy's email (Thurs Oct 25, 2018) and 20181024\_NASA\_ISS\_surface\_crew\_QC\_readCounts.xlsx

```
pmva_samples <- the_samples$genus %>%
  select(-lmat) %>%
  mutate(
    visgrp = case_when(
      experiment == "crew" & location %in% c("mouth", "saliva") ~ "oral",
      experiment == "crew" & location %in% c("ear", "nostril") ~ "earnose",
      experiment == "crew" ~ location, # skin
      study == "MT1" ~ study,
      study == "MT2" ~ flight_group
    ),
    is_oral = visgrp == "oral",
    is_f4 = flight_group == "f4",
    is_skin_f4surf = location == "skin" |
      (experiment == "surfaces" & is_f4),
    is_skin_mt2surf = location == "skin" |
      (experiment == "surfaces" & study == "MT2"),
    fsloc = ifelse(experiment == "crew", flight_status, location)
  )

pmva_samples <- pmva_samples %>%
  filter(
    pma_treated == "no",
    !(sample %in% c("S1_R+1_Pool", "S1+R-9_Pool")), # no library peak
    sample != "F4_4S", # red in xlsx
  )

pmva_otu <- prep_pmva(pmva_samples)
```

```
#> Joining, by = "sample"
#> Joining, by = "sample"
```

### 5.3.3 Visible groups

The NMDS plot shows samples may group into oral, ear/nose, skin, flights 1–3, flight 4, flight 5.

```
grps_rhs <- ~ sum_reads + visgrp
pmva_visgrps <- pmva_otu %>%
```

## 5 Beta-diversity

Table 5.1: sum\_reads + visgrp

| tax_rank | abundtype  | term      | df | SumOfSqs     | R2        | statistic | p.value |
|----------|------------|-----------|----|--------------|-----------|-----------|---------|
| genus    |            | sum_reads | 1  | 4.038584e-01 | 0.0195480 | 1.967348  | 0.030   |
|          |            | visgrp    | 5  | 1.575424e+00 | 0.0762555 | 1.534898  | 0.010   |
|          | read_count | Residual  | 91 | 1.868054e+01 | 0.9041965 | NA        | NA      |
|          |            | Total     | 97 | 2.065982e+01 | 1.0000000 | NA        | NA      |
|          |            | sum_reads | 1  | 1.487514e+04 | 0.0204641 | 2.113292  | 0.048   |
|          |            | visgrp    | 5  | 7.147785e+04 | 0.0983341 | 2.030954  | 0.003   |
|          | clr_zero   | Residual  | 91 | 6.405348e+05 | 0.8812018 | NA        | NA      |
|          |            | Total     | 97 | 7.268878e+05 | 1.0000000 | NA        | NA      |
| species  |            | sum_reads | 1  | 4.616192e-01 | 0.0179808 | 1.819165  | 0.051   |
|          |            | visgrp    | 5  | 2.119762e+00 | 0.0825680 | 1.670727  | 0.003   |
|          | read_count | Residual  | 91 | 2.309155e+01 | 0.8994513 | NA        | NA      |
|          |            | Total     | 97 | 2.567294e+01 | 1.0000000 | NA        | NA      |
|          |            | sum_reads | 1  | 5.958969e+04 | 0.0209714 | 2.190899  | 0.049   |
|          |            | visgrp    | 5  | 3.068029e+05 | 0.1079730 | 2.256009  | 0.002   |
|          | clr_zero   | Residual  | 91 | 2.475085e+06 | 0.8710556 | NA        | NA      |
|          |            | Total     | 97 | 2.841478e+06 | 1.0000000 | NA        | NA      |

```
do_adonis(grps_rhs, data = pmva_samples, by = "terms", permutations = 999, parallel = "none")
select(tax_rank, abundtype, tdy) %>%
unnest(tdy)

pmva_visgrps %>%
kable(caption = fmlacap(grps_rhs)) %>%
kable_styling_scale() %>%
collapse_rows(1:2)

pmva_visgrps %>% write_tsv("results/permanova_visiblegroups_sequential.tsv")
```

### 5.3.4 Surfaces only: location or Flight

Do environmental surface samples separate by flight group or by location after accounting for each other term?



```
locfgr_rhs <- ~ sum_reads + flight_group + location
pmva_surfsamples <- filter(pmva_samples, experiment == "surfaces")
pmva_surfotu <- prep_pmva(pmva_surfsamples)
```

```
#> Joining, by = "sample"
#> Joining, by = "sample"
```

```
pmva_locfgr <- pmva_surfotu %>%
  do_adonis(locfgr_rhs, data = pmva_surfsamples, by = "margin", permutations = 999, parallel = FALSE) %>%
  select(tax_rank, abundtype, tdy) %>%
  unnest(tdy)
```

```
pmva_locfgr %>%
  kable(caption = fmlacap(locfgr_rhs)) %>%
  kable_styling_scale() %>%
  collapse_rows(1:2)
```

```
pmva_locfgr %>% write_tsv("results/permanova_location_flightgroup_marginal.tsv")
```

### 5.3.5 Crew only: body site or flight state

Do environmental surface samples separate by body site or by flight state (flight\_status) after accounting for each other term?

```
bdyfls_rhs <- ~ sum_reads + flight_status + location
pmva_crewsamples <- filter(pmva_samples, experiment == "crew")
pmva_crewotu <- prep_pmva(pmva_crewsamples)
```

```
#> Joining, by = "sample"
#> Joining, by = "sample"
```

```
pmva_bdyfls <- pmva_crewotu %>%
  do_adonis(bdyfls_rhs, data = pmva_crewsamples, by = "margin", permutations = 999, parallel = FALSE) %>%
  select(tax_rank, abundtype, tdy) %>%
  unnest(tdy)
```

```
pmva_bdyfls %>%
  kable(caption = fmlacap(bdyfls_rhs)) %>%
  kable_styling_scale() %>%
  collapse_rows(1:2)
```

5 Beta-diversity

Table 5.2: sum\_reads + flight\_group + location

| tax_rank | abundtype  | term         | df | SumOfSqs     | R2        | statistic | p.value |
|----------|------------|--------------|----|--------------|-----------|-----------|---------|
| genus    | read_count | sum_reads    | 1  | 1.787626e-01 | 0.0283828 | 1.2941922 | 0.196   |
|          |            | flight_group | 4  | 1.903673e+00 | 0.3022535 | 3.4455179 | 0.001   |
|          |            | location     | 7  | 1.050665e+00 | 0.1668181 | 1.0866468 | 0.267   |
|          |            | Residual     | 23 | 3.176916e+00 | 0.5044111 | NA        | NA      |
|          |            | Total        | 35 | 6.298267e+00 | 1.0000000 | NA        | NA      |
|          | clr_zero   | sum_reads    | 1  | 1.016205e+04 | 0.0327383 | 1.6108048 | 0.117   |
|          |            | flight_group | 4  | 1.100184e+05 | 0.3544374 | 4.3598031 | 0.001   |
|          |            | location     | 7  | 4.896659e+04 | 0.1577517 | 1.1088257 | 0.262   |
|          |            | Residual     | 23 | 1.450997e+05 | 0.4674558 | NA        | NA      |
|          |            | Total        | 35 | 3.104030e+05 | 1.0000000 | NA        | NA      |
| species  | read_count | sum_reads    | 1  | 2.421073e-01 | 0.0291354 | 1.3182083 | 0.179   |
|          |            | flight_group | 4  | 2.523884e+00 | 0.3037264 | 3.4354652 | 0.001   |
|          |            | location     | 7  | 1.364066e+00 | 0.1641528 | 1.0609952 | 0.328   |
|          |            | Residual     | 23 | 4.224270e+00 | 0.5083523 | NA        | NA      |
|          |            | Total        | 35 | 8.309730e+00 | 1.0000000 | NA        | NA      |
|          | clr_zero   | sum_reads    | 1  | 3.702087e+04 | 0.0316456 | 1.5418144 | 0.128   |
|          |            | flight_group | 4  | 4.338244e+05 | 0.3708353 | 4.5168897 | 0.001   |
|          |            | location     | 7  | 1.654215e+05 | 0.1414031 | 0.9841909 | 0.516   |
|          |            | Residual     | 23 | 5.522584e+05 | 0.4720733 | NA        | NA      |
|          |            | Total        | 35 | 1.169857e+06 | 1.0000000 | NA        | NA      |

Table 5.3: sum\_reads + flight\_status + location

| tax_rank | abundtype  | term          | df | SumOfSqs     | R2        | statistic | p.value |
|----------|------------|---------------|----|--------------|-----------|-----------|---------|
| genus    | read_count | sum_reads     | 1  | 1.492103e-01 | 0.0125320 | 0.9072579 | 0.447   |
|          |            | flight_status | 2  | 4.225660e-01 | 0.0354907 | 1.2846846 | 0.152   |
|          |            | location      | 4  | 1.787164e+00 | 0.1501014 | 2.7166673 | 0.001   |
|          |            | Residual      | 54 | 8.880998e+00 | 0.7459023 | NA        | NA      |
|          |            | Total         | 61 | 1.190638e+01 | 1.0000000 | NA        | NA      |
|          | clr_zero   | sum_reads     | 1  | 2.612681e+03 | 0.0090008 | 0.7257966 | 0.562   |
|          |            | flight_status | 2  | 1.064266e+04 | 0.0366642 | 1.4782532 | 0.143   |
|          |            | location      | 4  | 5.505580e+04 | 0.1896686 | 3.8235928 | 0.001   |
|          |            | Residual      | 54 | 1.943861e+05 | 0.6696650 | NA        | NA      |
|          |            | Total         | 61 | 2.902736e+05 | 1.0000000 | NA        | NA      |
| species  | read_count | sum_reads     | 1  | 1.770639e-01 | 0.0123572 | 0.9067693 | 0.459   |
|          |            | flight_status | 2  | 5.054934e-01 | 0.0352781 | 1.2943516 | 0.150   |
|          |            | location      | 4  | 2.222727e+00 | 0.1551229 | 2.8457247 | 0.001   |
|          |            | Residual      | 54 | 1.054452e+01 | 0.7358968 | NA        | NA      |
|          |            | Total         | 61 | 1.432881e+01 | 1.0000000 | NA        | NA      |
|          | clr_zero   | sum_reads     | 1  | 1.064152e+04 | 0.0091227 | 0.7838672 | 0.443   |
|          |            | flight_status | 2  | 3.845982e+04 | 0.0329705 | 1.4164988 | 0.181   |
|          |            | location      | 4  | 2.528447e+05 | 0.2167566 | 4.6562127 | 0.001   |
|          |            | Residual      | 54 | 7.330858e+05 | 0.6284537 | NA        | NA      |
|          |            | Total         | 61 | 1.166491e+06 | 1.0000000 | NA        | NA      |

```
pmva_bdyfls %>% write_tsv("results/permanova_bodysite_flightstate_marginal.tsv")
```

### 5.3.6 Flight 4 surfaces and skin

We test whether Flight 4 surfaces and skin samples form a group versus samples from other flights or body sites. We nest location in groups (a/b means a + b %in% a and equivalently a + a:b) and restrict permutations to within locations.

```
skinf4_rhs <- ~ sum_reads +
  is_skin_mt2surf / location + is_skin_f4surf / location
perm <- how(nperm = 999, blocks = pmva_samples$fsloc)
pmva_skinf4 <- pmva_otu %>%
  do_adonis(skinf4_rhs, data = pmva_samples, by = "terms", permutations = perm, parallel = 1)
  select(tax_rank, abundtype, tdy) %>%
  unnest(tdy)

pmva_skinf4 %>%
  kable(caption = fmlacap(skinf4_rhs)) %>%
  kable_styling_scale() %>%
  collapse_rows(columns = 1:2)
```

```
pmva_skinf4 %>% write_tsv("results/permanova_skinf4.tsv")
```

### 5.3.7 “One big model”

Sequentially test a bunch of grouping terms (order matters).

```
obm_rhs <- ~ sum_reads +
  experiment + study + flight_group + flight_status +
  is_oral + is_skin_mt2surf + is_skin_f4surf + location
pmva_obm <- pmva_otu %>%
  do_adonis(obm_rhs, data = pmva_samples, by = "terms", permutations = 999, parallel = 1)
  select(tax_rank, abundtype, tdy) %>%
  unnest(tdy)

pmva_obm %>%
  kable(caption = fmlacap(obm_rhs)) %>%
  kable_styling_scale() %>%
  collapse_rows(1:2)
```

Table 5.4: sum\_reads + is\_skin\_mt2surf/location + is\_skin\_f4surf/lo...

| tax_rank | abundtype  | term                     | df | SumOfSqs     | R2        | statistic | p.value |
|----------|------------|--------------------------|----|--------------|-----------|-----------|---------|
|          |            | sum_reads                | 1  | 4.038584e-01 | 0.0195480 | 1.9317935 | 0.065   |
|          |            | is_skin_mt2surf          | 1  | 3.071019e-01 | 0.0148647 | 1.4689741 | 0.102   |
|          |            | is_skin_f4surf           | 1  | 1.989046e-01 | 0.0096276 | 0.9514290 | 0.353   |
|          |            | is_skin_mt2surf:location | 18 | 4.295713e+00 | 0.2079259 | 1.1415483 | 0.076   |
|          | read_count | is_skin_f4surf:location  | 6  | 8.201290e-01 | 0.0396968 | 0.6538265 | 0.951   |
|          |            | Residual                 | 70 | 1.463411e+01 | 0.7083369 | NA        | NA      |
|          |            | Total                    | 97 | 2.065982e+01 | 1.0000000 | NA        | NA      |
|          |            | sum_reads                | 1  | 1.487514e+04 | 0.0204641 | 2.0000055 | 0.159   |
| genus    |            | is_skin_mt2surf          | 1  | 8.700234e+03 | 0.0119692 | 1.1697720 | 0.231   |
|          |            | is_skin_f4surf           | 1  | 6.882916e+03 | 0.0094690 | 0.9254283 | 0.386   |
|          |            | is_skin_mt2surf:location | 18 | 1.562442e+05 | 0.2149496 | 1.1670829 | 0.041   |
|          | clr_zero   | is_skin_f4surf:location  | 6  | 1.955700e+04 | 0.0269051 | 0.4382493 | 1.000   |
|          |            | Residual                 | 70 | 5.206283e+05 | 0.7162430 | NA        | NA      |
|          |            | Total                    | 97 | 7.268878e+05 | 1.0000000 | NA        | NA      |
|          |            | sum_reads                | 1  | 4.616192e-01 | 0.0179808 | 1.7771308 | 0.115   |
|          |            | is_skin_mt2surf          | 1  | 3.814701e-01 | 0.0148588 | 1.4685744 | 0.091   |
|          |            | is_skin_f4surf           | 1  | 2.547334e-01 | 0.0099223 | 0.9806667 | 0.320   |
|          |            | is_skin_mt2surf:location | 18 | 5.408609e+00 | 0.2106736 | 1.1567742 | 0.032   |
|          | read_count | is_skin_f4surf:location  | 6  | 9.836297e-01 | 0.0383139 | 0.6311257 | 0.973   |
|          |            | Residual                 | 70 | 1.818287e+01 | 0.7082507 | NA        | NA      |
|          |            | Total                    | 97 | 2.567294e+01 | 1.0000000 | NA        | NA      |
|          |            | sum_reads                | 1  | 5.958969e+04 | 0.0209714 | 2.0924832 | 0.193   |
| species  |            | is_skin_mt2surf          | 1  | 3.258778e+04 | 0.0114686 | 1.1443152 | 0.274   |
|          |            | is_skin_f4surf           | 1  | 3.275258e+04 | 0.0115266 | 1.1501020 | 0.232   |
|          |            | is_skin_mt2surf:location | 18 | 6.513973e+05 | 0.2292460 | 1.2707623 | 0.018   |
|          | clr_zero   | is_skin_f4surf:location  | 6  | 7.169210e+04 | 0.0252306 | 0.4195763 | 0.999   |
|          |            | Residual                 | 70 | 1.993458e+06 | 0.7015569 | NA        | NA      |
|          |            | Total                    | 97 | 2.841478e+06 | 1.0000000 | NA        | NA      |

5 Beta-diversity

Table 5.5: sum\_reads + experiment + study + flight\_group + flight\_s...

| tax_rank | abundtype  | term            | df | SumOfSqs     | R2        | statistic | p.value |
|----------|------------|-----------------|----|--------------|-----------|-----------|---------|
|          | read_count | sum_reads       | 1  | 4.038584e-01 | 0.0195480 | 2.0805427 | 0.028   |
|          |            | experiment      | 1  | 3.501662e-01 | 0.0169491 | 1.8039385 | 0.042   |
|          |            | study           | 1  | 5.864768e-01 | 0.0283873 | 3.0213314 | 0.002   |
|          |            | flight_group    | 3  | 8.425895e-01 | 0.0407840 | 1.4469126 | 0.042   |
|          |            | flight_status   | 2  | 8.279517e-01 | 0.0400755 | 2.1326643 | 0.008   |
|          |            | is_oral         | 1  | 1.010554e-01 | 0.0048914 | 0.5206033 | 0.987   |
|          |            | is_skin_mt2surf | 1  | 3.912526e-01 | 0.0189378 | 2.0156016 | 0.024   |
|          |            | location        | 9  | 2.015731e+00 | 0.0975677 | 1.1538188 | 0.133   |
|          |            | Residual        | 78 | 1.514074e+01 | 0.7328592 | NA        | NA      |
|          |            | Total           | 97 | 2.065982e+01 | 1.0000000 | NA        | NA      |
| genus    | clr_zero   | sum_reads       | 1  | 1.487514e+04 | 0.0204641 | 2.2624723 | 0.023   |
|          |            | experiment      | 1  | 2.025259e+04 | 0.0278621 | 3.0803708 | 0.008   |
|          |            | study           | 1  | 2.976236e+04 | 0.0409449 | 4.5267837 | 0.002   |
|          |            | flight_group    | 3  | 3.300957e+04 | 0.0454122 | 1.6735587 | 0.038   |
|          |            | flight_status   | 2  | 3.976016e+04 | 0.0546992 | 3.0237126 | 0.001   |
|          |            | is_oral         | 1  | 3.353509e+03 | 0.0046135 | 0.5100607 | 0.920   |
|          |            | is_skin_mt2surf | 1  | 1.469828e+04 | 0.0202208 | 2.2355732 | 0.031   |
|          |            | location        | 9  | 5.834755e+04 | 0.0802704 | 0.9860580 | 0.510   |
|          |            | Residual        | 78 | 5.128286e+05 | 0.7055128 | NA        | NA      |
|          |            | Total           | 97 | 7.268878e+05 | 1.0000000 | NA        | NA      |
|          | read_count | sum_reads       | 1  | 4.616192e-01 | 0.0179808 | 1.9243837 | 0.027   |
|          |            | experiment      | 1  | 5.031293e-01 | 0.0195977 | 2.0974297 | 0.009   |
|          |            | study           | 1  | 7.865744e-01 | 0.0306383 | 3.2790464 | 0.001   |
|          |            | flight_group    | 3  | 1.008822e+00 | 0.0392952 | 1.4018490 | 0.055   |
|          |            | flight_status   | 2  | 1.161912e+00 | 0.0452583 | 2.4218717 | 0.003   |
|          |            | is_oral         | 1  | 1.366689e-01 | 0.0053235 | 0.5697409 | 0.980   |
|          |            | is_skin_mt2surf | 1  | 5.180038e-01 | 0.0201770 | 2.1594379 | 0.018   |
|          |            | location        | 9  | 2.385644e+00 | 0.0929245 | 1.1050219 | 0.207   |
|          |            | Residual        | 78 | 1.871056e+01 | 0.7288049 | NA        | NA      |
|          |            | Total           | 97 | 2.567294e+01 | 1.0000000 | NA        | NA      |
| species  | clr_zero   | sum_reads       | 1  | 5.958969e+04 | 0.0209714 | 2.3622543 | 0.032   |
|          |            | experiment      | 1  | 8.265407e+04 | 0.0290884 | 3.2765724 | 0.009   |
|          |            | study           | 1  | 1.254404e+05 | 0.0441462 | 4.9727080 | 0.001   |
|          |            | flight_group    | 3  | 1.210360e+05 | 0.0425961 | 1.5993695 | 0.061   |
|          |            | flight_status   | 2  | 1.595452e+05 | 0.0561487 | 3.1623457 | 0.001   |
|          |            | is_oral         | 1  | 1.419223e+04 | 0.0049947 | 0.5626085 | 0.827   |
|          |            | is_skin_mt2surf | 1  | 7.460940e+04 | 0.0262573 | 2.9576657 | 0.015   |
|          |            | location        | 9  | 2.368005e+05 | 0.0833371 | 1.0430274 | 0.386   |
|          |            | Residual        | 78 | 1.967610e+06 | 0.6924602 | NA        | NA      |
|          |            | Total           | 97 | 2.841478e+06 | 1.0000000 | NA        | NA      |

```
pmva_obm %>% write_tsv("results/permanova_onebigmodel.tsv")
```

## 5.4 *aldex.glm*

We can explicitly test for differential abundance (relative to a mean) of each taxon between sample types.

ALDEx2 approaches this by fitting a glm to predict abundance from sample conditions (clr-transformed abundances). ALDEx2 first generates a distribution of abundances by sampling from a dirichlet posterior (adding a 0.5 pseudo count to observed counts to estimate the concentration hyperparameter).

ALDEx2 fits the glm and tests the sample type coefficients for significance for each montecarlo instance, adjusts the p-values for multiple testing, and finally averages the p-values to report an expected p-value for each taxon.

*aldex.glm* also performs a Kruskal-Wallis test. This is a non-parametric test which compares two or more samples of potentially multiple sizes. It is similar to the Mann-Whitney U-test, and tests if at least one sample is drawn from a different distribution than the rest.

Basically,

```
for each mc instance m:
  for each taxon t:
    fits <- glm(clr ~ factor(conditions))
    glm_pvalue[m,t] <- drop1(fits, test = "Chis")
    kw_pvalues[m,t] <- kruskal.test(clr, factor(conditions))
    glm_padj[m,] <- p.adjust(glm_pvalues[m,])
    kw_padj[m,] <- p.adjust(kw_pvalues[m,])
for each taxon t:
  average(glm_pvalues[,t])
  average(glm_padj[,t])
  average(kw_pvalues[,t])
  average(kw_padj[,t])
```

## 5.5 Saliva by flight state

This next part should take 3–5 hours. Set `mc.max` to 2 for debugging.

Plot previously computed data.

## 5 *Beta-diversity*

```
#> Joining, by = "genus"
```

```
#> Joining, by = "species"
```

```
#> Joining, by = c("study", "sample", "flight_group", "swab_location_code", "pma_tr
```

```
#> Joining, by = c("study", "sample", "flight_group", "swab_location_code", "pma_tr
```



### 5.5 Saliva by flight state

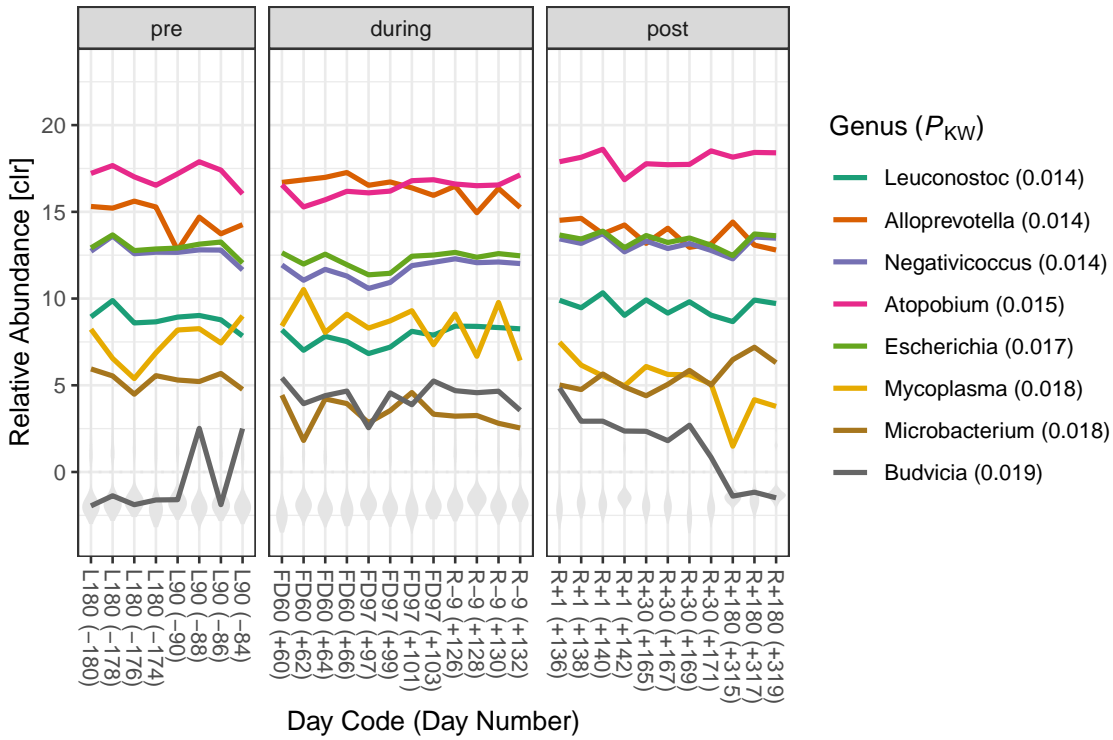

saliva genus

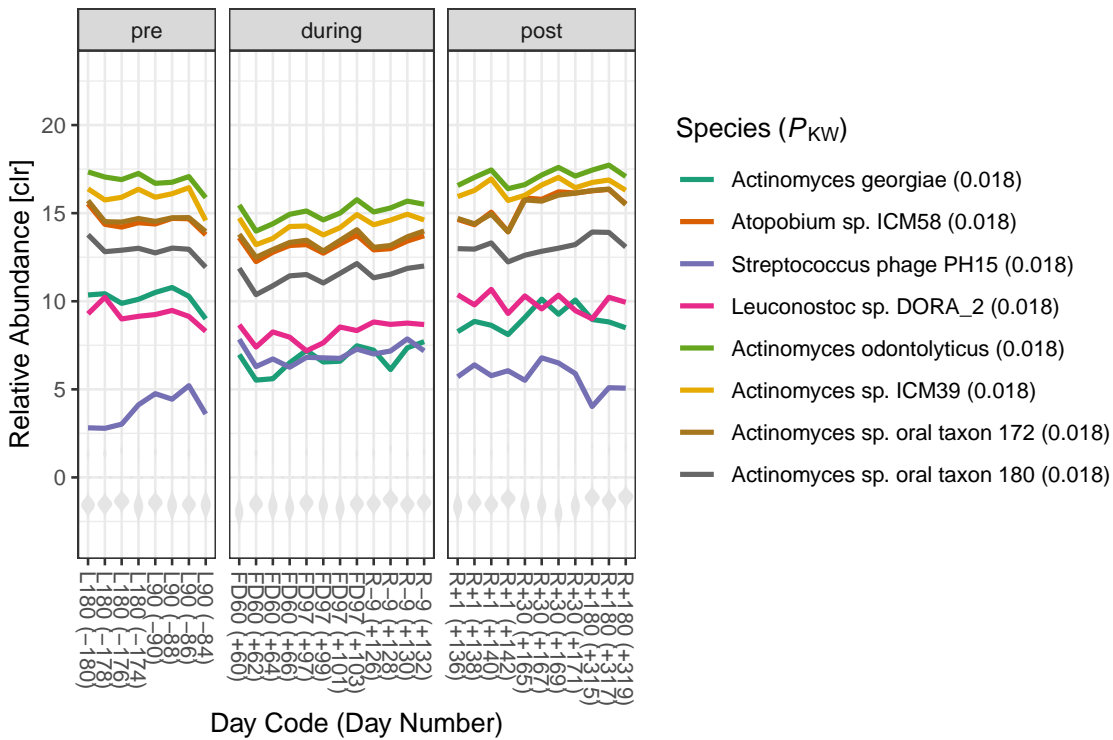

saliva species

## 5 Beta-diversity

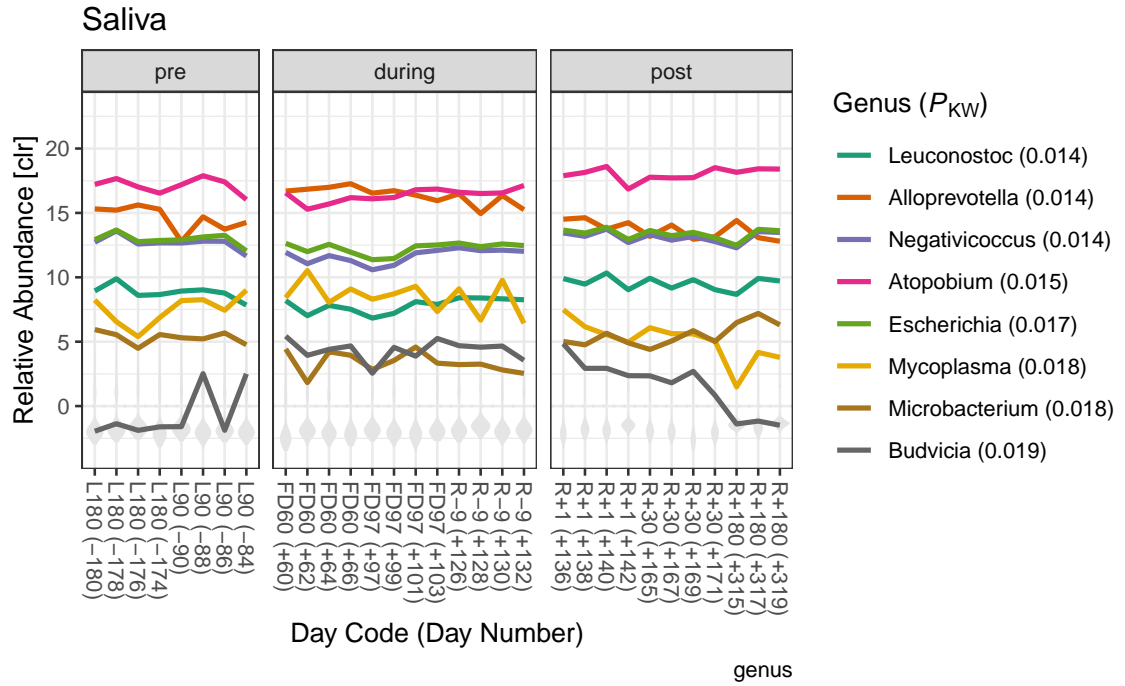

## 5.6 “Venn” (Euler) Diagrams

Euler diagrams are another way to summarize taxa shared by multiple conditions or locations.

The area of the overlaps is proportional to the number of shared vs total taxa in each condition. For these figures, a taxon need only be seen in one sample for it to be considered present for the particular condition it was sampled from.

### 5.6.1 Saliva

Shared taxa among pre, during, post flight in saliva.

**A**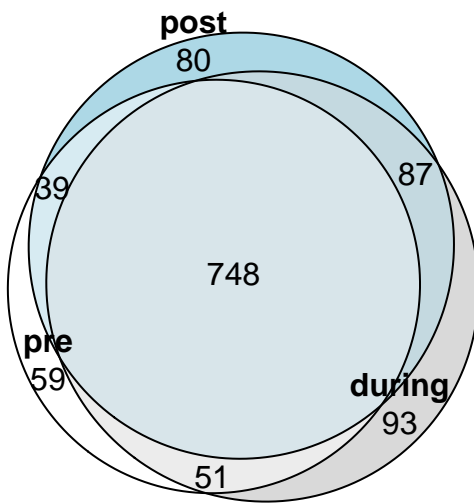**B**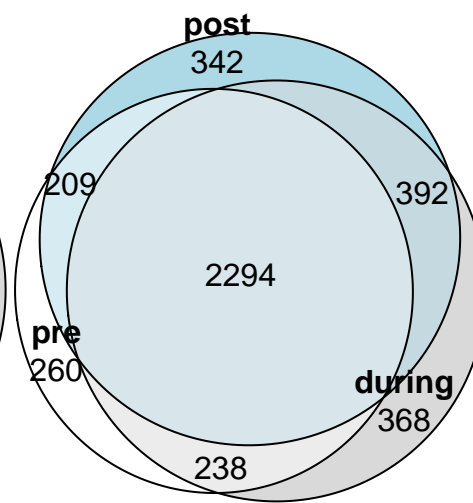

### 5.6.2 Skin

Skin vs surfaces across flight groups (no PMA)

```
#> Warning in do_euler(.x, reformulate("set", .y)): probably a bad fit, quantities
#> and areas may be inaccurate
```

```
#> Warning in do_euler(.x, reformulate("set", .y)): probably a bad fit, quantities
#> and areas may be inaccurate
```

5 Beta-diversity

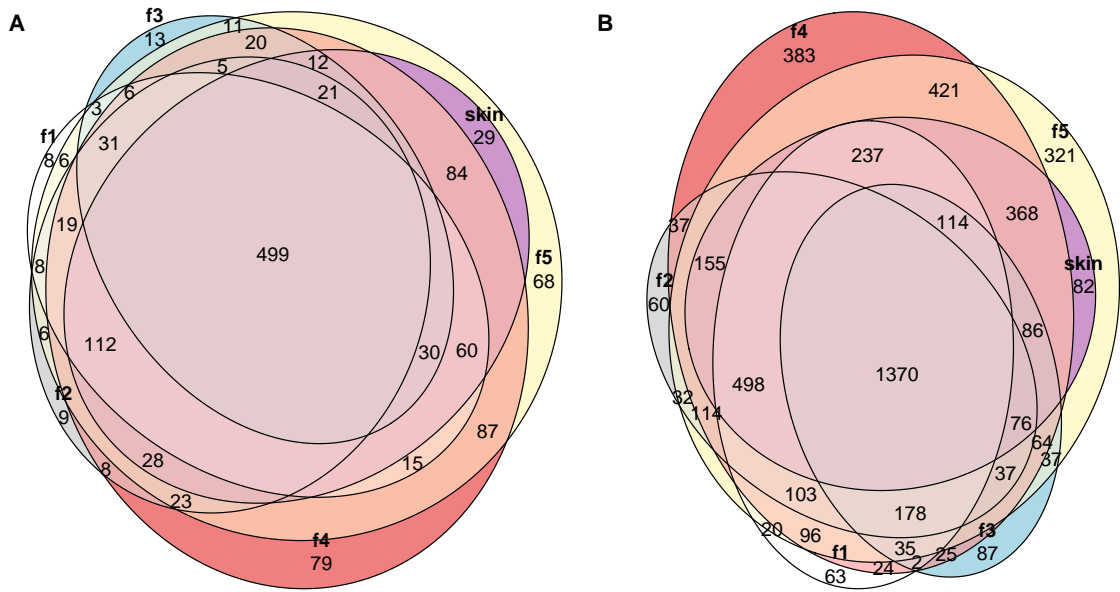

5.6.2.1 F4, F5, and skin only

Skin vs surfaces across F4 and F5 only (no PMA)

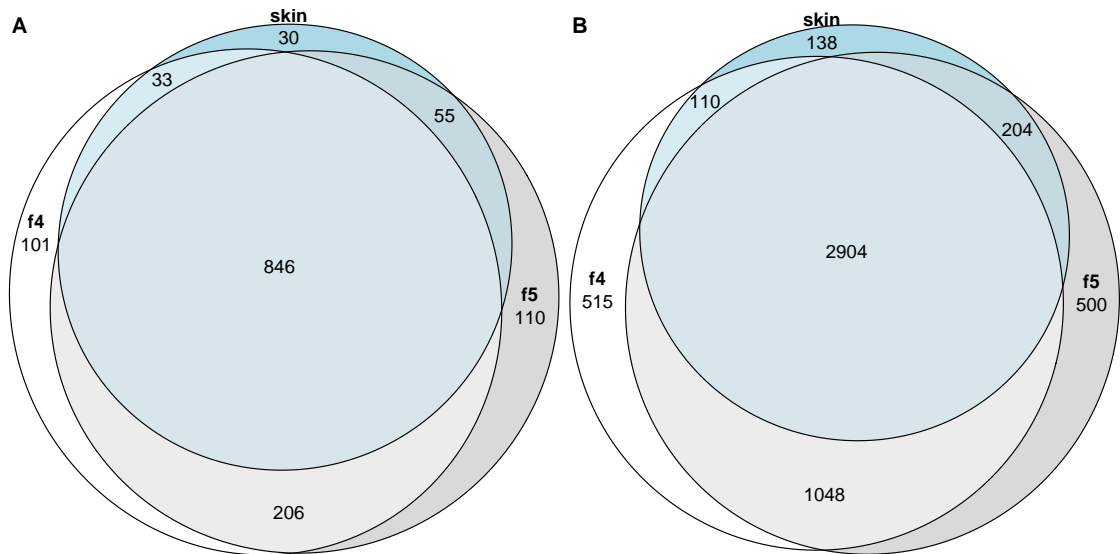

5.6.3 F4 vs Skin pre, during, post

Flight 4 surfaces and pre, during, post flight

| tax_rank | flight_status | numer | denom | frac      |
|----------|---------------|-------|-------|-----------|
| genus    | pre           | 761   | 797   | 0.9548306 |
|          | during        | 430   | 437   | 0.9839817 |
|          | post          | 664   | 690   | 0.9623188 |
| species  | pre           | 2350  | 2504  | 0.9384984 |
|          | during        | 1348  | 1389  | 0.9704824 |
|          | post          | 2234  | 2361  | 0.9462092 |

5.6.4 Surfaces MT1 vs MT2

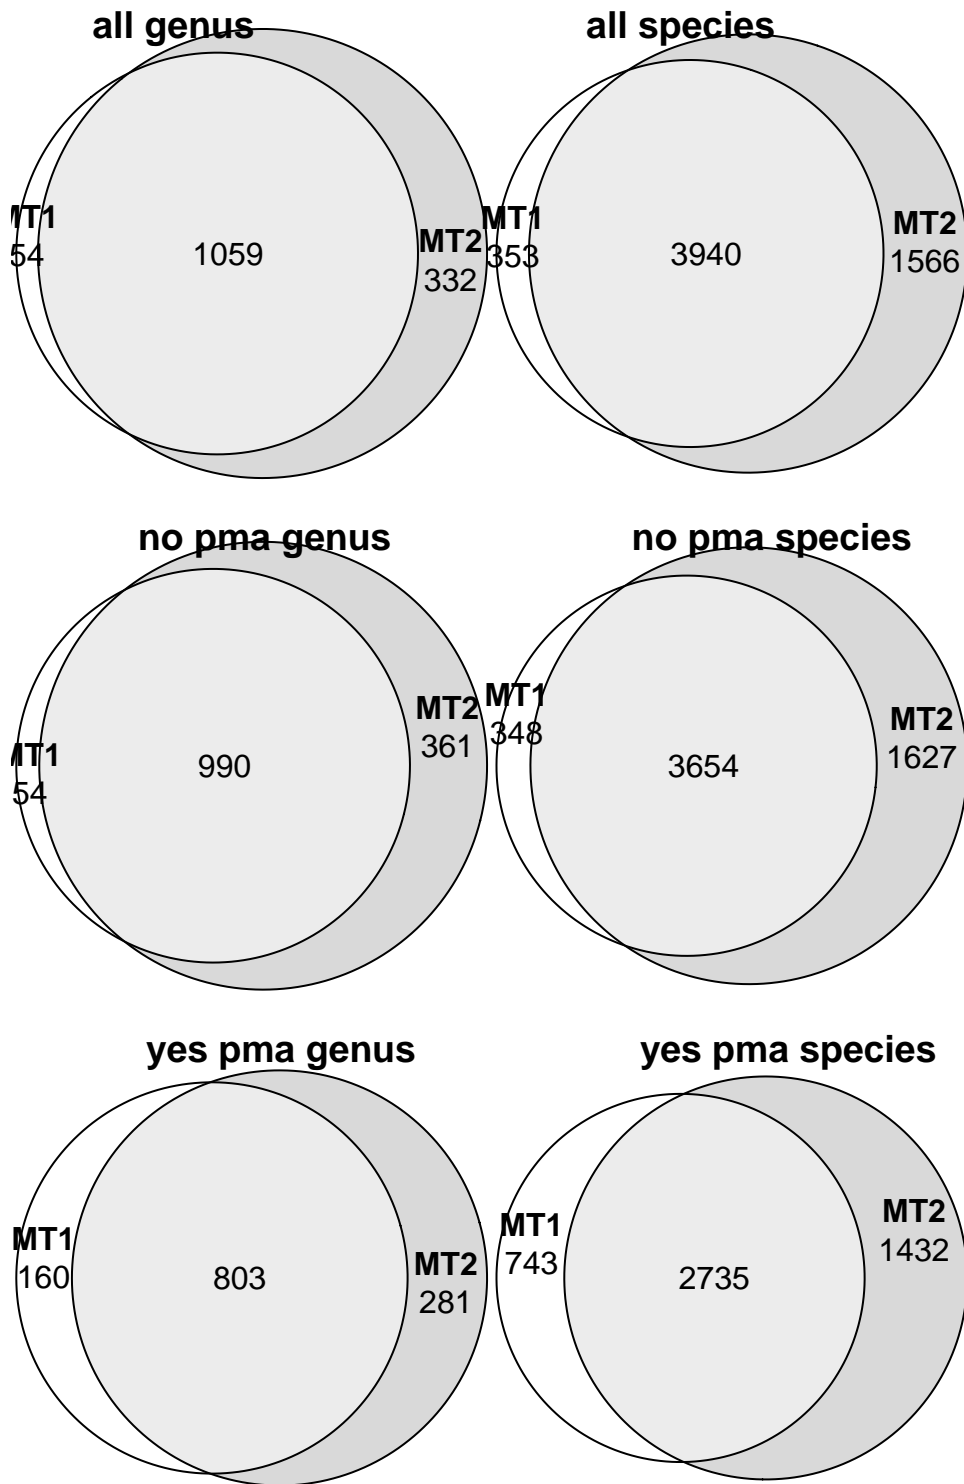

## 6 SourceTracker

SourceTracker results by Camilla Urbaniak [camilla.urbaniak@jpl.nasa.gov](mailto:camilla.urbaniak@jpl.nasa.gov)

Tests if microbial contribution from crewmember is different between flights 4 and 5. (the crewmember is "S1"; flights 4 and 5 are "f4", "f5")

1. Loads manually created table with values copied from email from Camilla Urbaniak (subj: "Re: [EXTERNAL] Re: stats", date: June 15, 2019).
2. Treats average proportion as point estimates (instead of 10 tight samples).
3. t-test: Null hypothesis is that the mean S1 proportion in F4 is the same as the mean S1 proportion in F5.

```
#> Parsed with column specification:
#> cols(
#>   flight_group = col_character(),
#>   swab_location_code = col_double(),
#>   S1_mean = col_double(),
#>   S1_sd = col_double(),
#>   Unknown_mean = col_double(),
#>   Unknown_sd = col_double()
#> )

#> Joining, by = "swab_location_code"

#> # A tibble: 4 x 7
#>   stat      minimum    q1 median   mean    q3 maximum
#>   <chr>      <dbl> <dbl> <dbl> <dbl> <dbl> <dbl>
#> 1 S1_mean      0     0   0.02 0.221  0.39  0.89
#> 2 S1_sd        0     0     0  0.00459 0.01  0.01
#> 3 Unknown_mean 0.11  0.61  0.98 0.779   1     1
#> 4 Unknown_sd   0     0     0  0.00459 0.01  0.01
```

Standard deviations for sample distributions are small compared to the overall spread, so use means as point estimates.

| flight_group | mean      | var       | sd        | se        | n |
|--------------|-----------|-----------|-----------|-----------|---|
| f1           | 0.0371429 | 0.0058905 | 0.0767494 | 0.0290086 | 7 |
| f2           | 0.0157143 | 0.0010952 | 0.0330944 | 0.0125085 | 7 |
| f3           | 0.0014286 | 0.0000143 | 0.0037796 | 0.0014286 | 7 |
| f4           | 0.5537500 | 0.0854268 | 0.2922786 | 0.1033361 | 8 |
| f5           | 0.4187500 | 0.0164982 | 0.1284454 | 0.0454123 | 8 |

## 6.1 F4 vs F5

| estimate | statistic | p.value   | parameter | conf.low   | conf.high | method        | alternative |
|----------|-----------|-----------|-----------|------------|-----------|---------------|-------------|
| 0.135    | 1.188938  | 0.2732277 | 7         | -0.1334953 | 0.4034953 | Paired t-test | two.sided   |

### 6.1.1 Plot

Expected Species Proportion from Crew Member

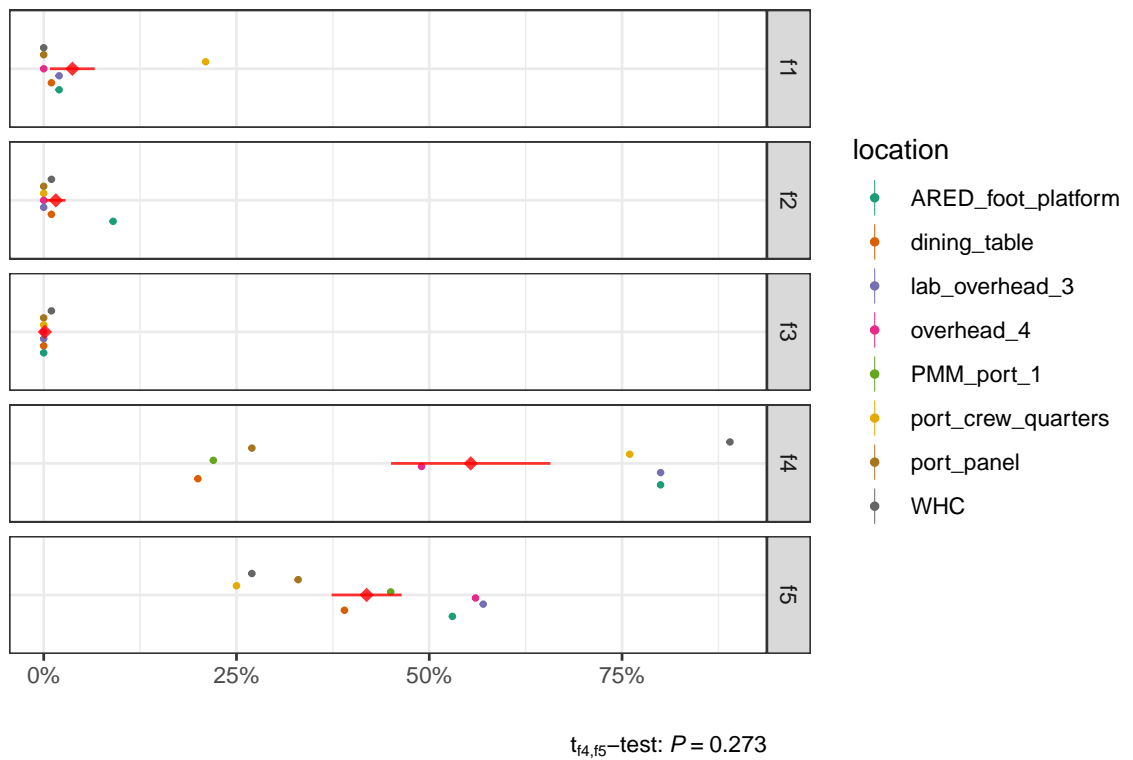

1. Hill MO. Diversity and Evenness: A Unifying Notation and Its Consequences. *Ecology*. 1973;54: 427–432. doi:10.2307/1934352



2. Warton DI, Wright ST, Wang Y. Distance-based multivariate analyses confound location and dispersion effects: Mean-variance confounding in multivariate analysis. *Methods in Ecology and Evolution*. 2012;3: 89–101. doi:10.1111/j.2041-210X.2011.00127.x
3. Anderson MJ. Permutational Multivariate Analysis of Variance (PERMANOVA). In: Balakrishnan N, Colton T, Everitt B, Piegorsch W, Ruggeri F, Teugels JL, editors. *Wiley StatsRef: Statistics Reference Online*. Chichester, UK: John Wiley & Sons, Ltd; 2017. pp. 1–15. doi:10.1002/9781118445112.stat07841
